# Supplementary material for: Injectable non-immunogenic PEG-like conjugate that forms a subcutaneous depot and enables sustained delivery of a peptide drug
Source: Research Square preprint supplement (doi:10.21203/rs.3.rs-737658/v1), 2021-07-28
Supplement: Supplementary file 1 [file e2334bbbda00a05585969a64.pdf]

**Injectable non-immunogenic PEG-like conjugate that forms a subcutaneous depot and enables  
sustained delivery of a peptide drug**

Imran Ozer<sup>1</sup>, Anna Slezak<sup>2†</sup>, Jeffrey I. Everitt<sup>3</sup>, Xinghai Li<sup>1</sup>, Nikita Zakharov<sup>1</sup>, Joel H. Collier<sup>1</sup>, Jonathan E.  
Campbell<sup>4,5,6</sup>, David A. D'Alessio<sup>4,5</sup>, and Ashutosh Chilkoti<sup>1\*</sup>

<sup>1</sup>Department of Biomedical Engineering, Duke University, Durham, North Carolina 27708, USA.

<sup>2</sup>Department of Chemistry, Duke University, Durham, North Carolina 27708, USA.

<sup>3</sup>Department of Pathology, Duke University Medical Center, Durham, North Carolina 27701, USA.

<sup>4</sup>Duke Molecular Physiology Institute, Duke University, Durham, North Carolina 27701, USA

<sup>5</sup>Division of Endocrinology, Duke University Medical Center, Durham, North Carolina, 27701, USA.

<sup>6</sup>Department of Pharmacology and Cancer Biology, Duke University, Durham, NC, USA.

<sup>†</sup>Present Address: Pritzker School of Molecular Engineering, University of Chicago, Chicago, Illinois,  
60637, USA.

\*e-mail: [chilkoti@duke.edu](mailto:chilkoti@duke.edu)

|    |                                                                                                          |           |
|----|----------------------------------------------------------------------------------------------------------|-----------|
| 14 | <b>Table of Contents</b>                                                                                 |           |
| 15 | <b>SECTION 1. SYNTHESIS AND CHARACTERIZATION OF POEGMA LIBRARY. ....</b>                                 | <b>3</b>  |
| 16 | <b>SECTION 2. SYNTHESIS AND CHARACTERIZATION OF SITE-SPECIFIC AND STOICHIOMETRIC EXENDIN CONJUGATES.</b> |           |
| 17 | <b>.....</b>                                                                                             | <b>15</b> |
| 18 | <b>SECTION 3. SHORT-TERM PHARMACOKINETICS AND PHARMACODYNAMICS .....</b>                                 | <b>28</b> |
| 19 | <b>SECTION 4. LONG-TERM EFFICACY .....</b>                                                               | <b>33</b> |
| 20 | <b>SECTION 5. IMMUNOGENICITY .....</b>                                                                   | <b>35</b> |
| 21 | <b>SECTION 6. EFFECT OF ADAs ON THE LONG-TERM EFFICACY .....</b>                                         | <b>56</b> |
| 22 | <b>SECTION 7. HISTOPATHOLOGICAL EFFECTS OF TREATMENTS .....</b>                                          | <b>61</b> |
| 23 |                                                                                                          |           |

**Section 1. Synthesis and characterization of POEGMA library.**

**Synthesis, purification, and characterization of an azide-functional amide-based polymerization initiator.**

2-Bromoisobutanoic acid N-hydroxy succinimide ester (4.1 mmol; 1.14 g) was purged with argon and dissolved in 5 ml anhydrous dichloromethane (DCM) (Flask 1). In a separate Schlenk flask (Flask 2), 3-azido-1-propanamine (4.9 mmol; 0.52 g) was purged with argon and dissolved in 11.09 ml anhydrous DCM, followed by cooling to 0°C in an ice bath. The solution in Flask 1 was then added dropwise to Flask 2 under an inert atmosphere. The resulting solution was kept on ice for 30 min and left stirring at 30°C for 12 h. The solution was diluted in DCM and passed through a polyvinylidene fluoride (PVDF) membrane to remove the solid phase. The resulting clear solution was washed with 0.5N HCl, saturated Na<sub>2</sub>HCO<sub>3</sub>, and 1M NaCl, respectively, and the organic phase was collected. The organic phase dried over anhydrous MgSO<sub>4</sub>, followed by filtration through a PVDF membrane and DCM evaporation under vacuum, yielding the polymerization initiator. The polymerization initiator was characterized by high-resolution mass spectrometry (HRMS) using an Agilent G6224 liquid chromatography mass spectrometry-time of flight (LCMS-TOF) using an electrospray ionization source (Agilent) and a Series 1200 high-pressure liquid chromatography (HPLC) (Agilent) (**Supplementary Fig. 1**) and nuclear magnetic resonance (NMR) spectroscopy using a 400 MHz Varian Inova spectrometer and an ACD/NMR analysis software (ACD Labs) (**Supplementary Fig. 2**).

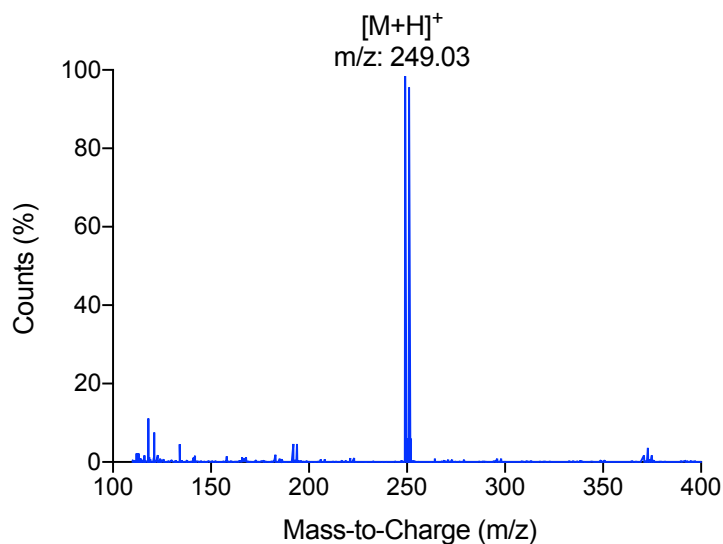

**Supplementary Figure 1. HRMS of the azide-functional amide-based polymerization initiator.** The initiator was analyzed using reverse-phase HPLC on an Agilent G6224 LCMS-TOF using a Series 1200 HPLC (Agilent) equipped with a diode array detector (Agilent) operating at 254 nm and connected to an electrospray ionization source (Agilent) operating in positive ion mode. 5  $\mu$ l of the polymerization initiator was diluted 1:20,000 (v/v) in methanol and separated on a Phenomenex Kinetix C18 column (3 mm internal diameter x 30 mm length, 2.6  $\mu$ m particle size) at 40°C. Mobile phase A and B consisted of 100:3:0.4 (v/v) water: methanol: formic acid and 100:3:0.3 (v/v) acetonitrile: water: formic acid, respectively. Mobile phase B was 0% for 2 min, with a linear gradient to 95% for 10 min, and held at 95% for 3 min. The flow rate was 0.35 ml min<sup>-1</sup>. The major peak at 249.03 Da was assigned as the [M+H]<sup>+</sup> ion, based on the initiator's theoretical mass (M) of 248.03 Da.

50

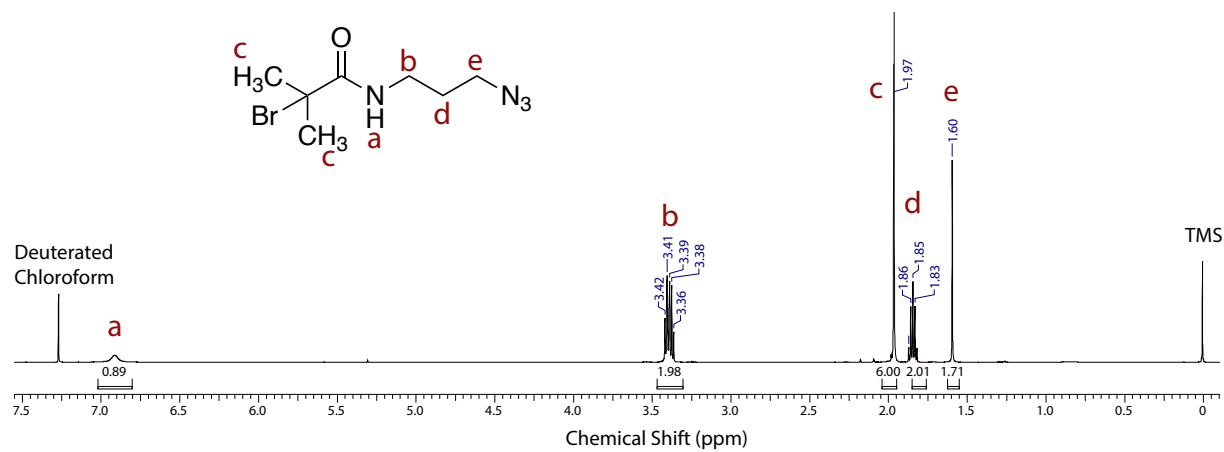

51

52 **Supplementary Figure 2. NMR spectrum of the azide functional amide-based polymerization initiator.** Data were acquired using  
 53 a 400 MHz Varian Inova spectrometer and analyzed using ACD/NMR software (ACD Labs). Deuterated chloroform and  
 54 tetramethylsilane (TMS) were used as a solvent and reference, respectively.

### Characterization of EG2 and EG3 monomers

Triethylene glycol methyl ether methacrylate (EG3) and diethylene glycol methyl ether methacrylate (EG2) monomers characterized using HRMS using an Agilent G6224 LCMS-TOF using an electrospray ionization source (Agilent) and a Series 1200 HPLC (Agilent) (**Supplementary Figures 3 and 5**) and NMR spectrometry using a 400 MHz Varian Inova spectrometer and an ACD/NMR analysis software (ACD Labs) (**Supplementary Figures 4 and 6**).

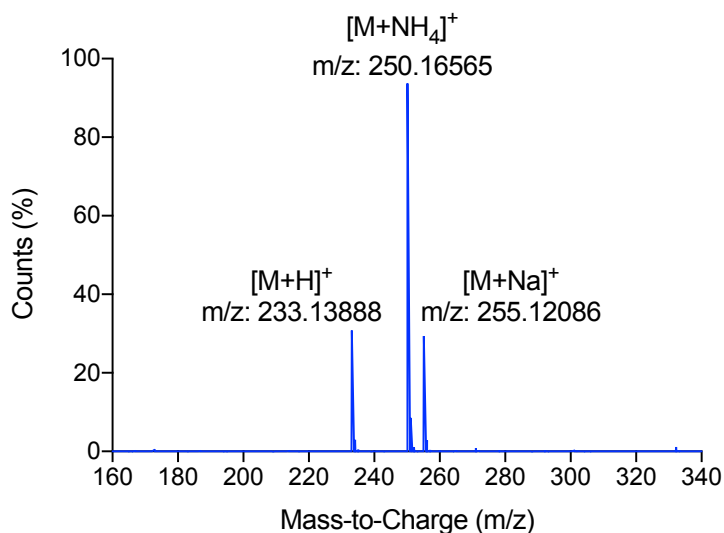

**Supplementary Figure 3. HRMS of EG3 monomer.** EG3 monomer was characterized using reverse-phase HPLC on an Agilent G6224 LCMS-TOF using a Series 1200 HPLC (Agilent) equipped with a diode array detector (Agilent) operating at 254 nm and connected to an electrospray ionization source (Agilent) operating in positive ion mode. 5  $\mu$ l of the monomer was diluted 1:20,000 (v/v) in water/acetonitrile and separated on a Phenomenex Kinetix C18 column (3 mm ID x 30 mm length, 2.6  $\mu$ m particle size) at 40°C. Mobile phase A and B consisted of 100:3:0.4 (v/v) water: methanol: formic acid and 100:3:0.3 (v/v) acetonitrile: water: formic acid, respectively. Mobile phase B was 0% for 2 min, with a linear gradient up to 95% from 8 min, and was then held at 95% for 5 min. The flow rate was 0.35 ml min<sup>-1</sup>. Based on the EG3 monomer's theoretical mass (M) of 212.13 Da, the major peaks at 233.13, 250.16, and 255.12 Da were assigned as the [M+H]<sup>+</sup>, [M+NH<sub>4</sub>]<sup>+</sup>, and [M+Na]<sup>+</sup> ions, respectively.

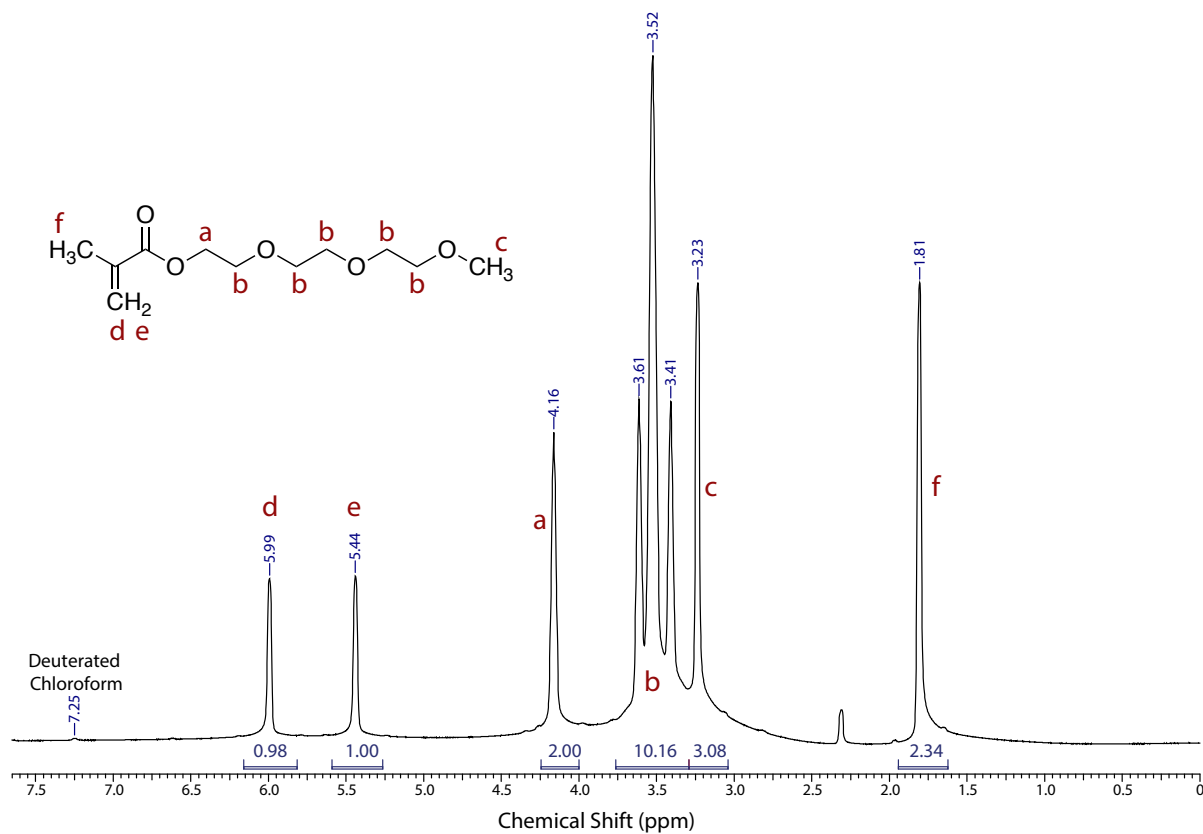

**Supplementary Figure 4. NMR spectrum of EG3 monomer.** Data were acquired on a 400 MHz Varian Inova NMR spectrometer and analyzed using ACD/NMR software (ACD Labs). Deuterated chloroform was used as the solvent.

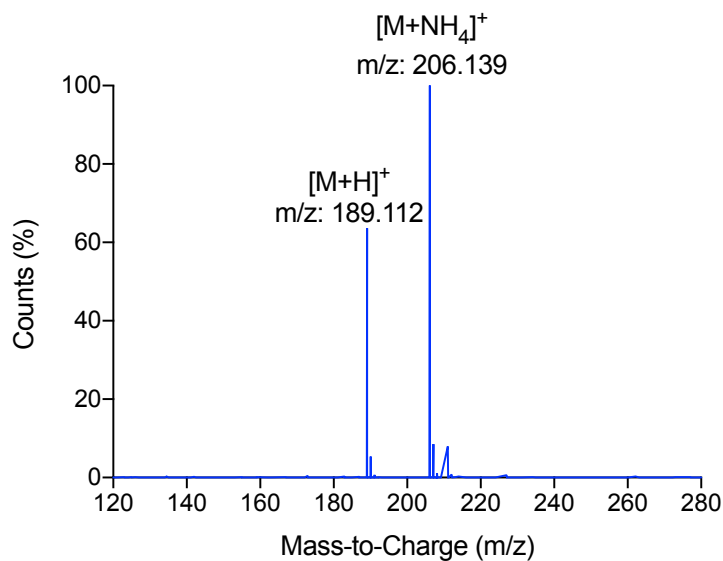

**Supplementary Figure 5. HRMS of EG2 monomer.** The monomer was characterized using reverse-phase HPLC on an Agilent G6224 LCMS-TOF using a Series 1200 HPLC (Agilent) equipped with a diode array detector (Agilent) operating at 254 nm and connected to an electrospray ionization source (Agilent) operating in positive ion mode. 5  $\mu$ l of the monomer was diluted 1:20,000 (v/v) in water/MeCN and separated on a Phenomenex Kinetix C18 column (3 mm ID x 30 mm length, 2.6  $\mu$ m particle size) at 40°C. The mobile phases A and B consisted of 100:3:0.4 (v/v) water: MeOH: formic acid and 100:3:0.3 (v/v) MeCN: water: formic acid, respectively. Mobile phase B was 0% from 0-2 min, then gradually ramped up to 95% from 2-10 min, held at 95% for 10-15 min. The flow rate was 0.35 ml min<sup>-1</sup>. The major peaks at 189.1 and 209.1 were assigned as  $[M+H]^+$  and  $[M+NH_4]^+$  ions based on the EG2 monomer's theoretical mass (M) of 188.1 Da.



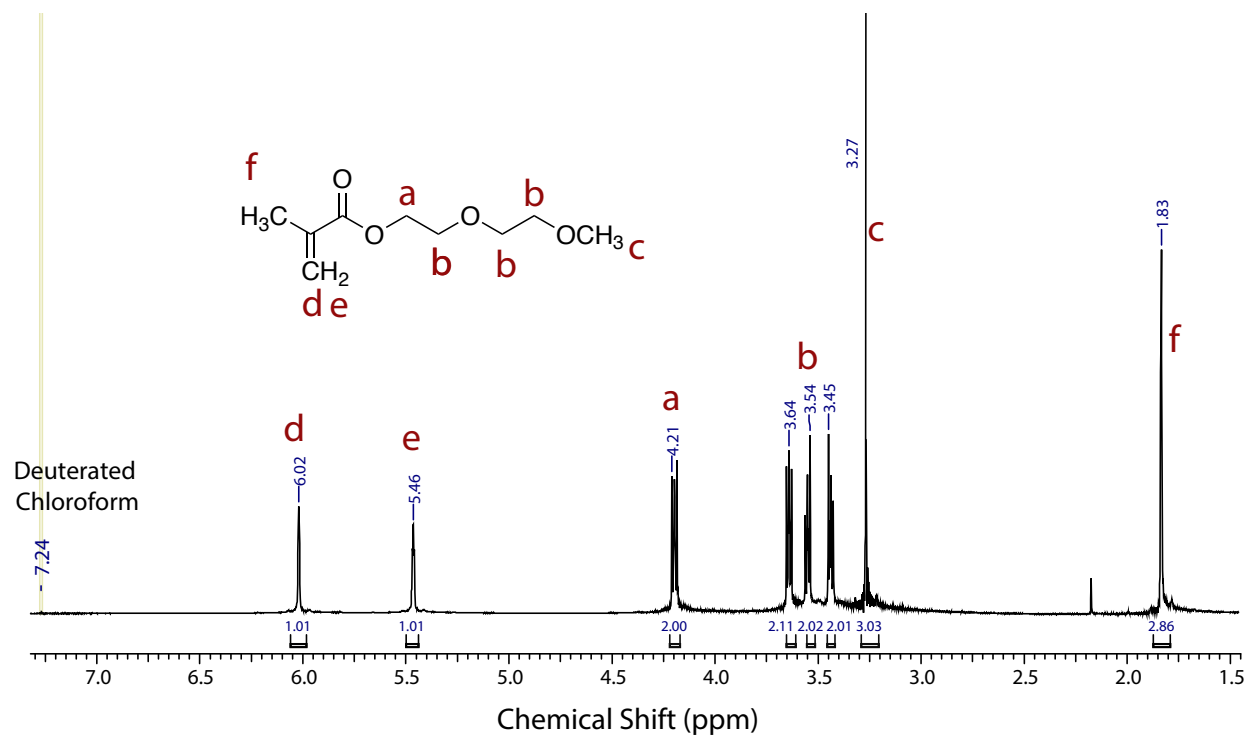

**Supplementary Figure 6. NMR spectrum of EG2 monomer.** Data were acquired using a 400 MHz Varian Inova NMR spectrometer and analyzed using ACD/NMR software (ACD Labs). Deuterated chloroform was used as the solvent.

**Supplementary Table 1. Summary of POEGMA library characterization.** The monomer composition of the POEGMAs was defined as the mole percentage of EG2 (or EG3) content in the copolymer derived from the NMR spectra shown in Supplementary Fig. 7-8. The DP,  $M_n$ ,  $M_w$ , and  $\bar{D}$  were determined from GPC-MALS data shown in Supplementary Fig. 9. The  $R_h$  was calculated from DLS data shown in Supplementary Fig. 10.  $T_t$  was derived from UV-vis spectrophotometry curves shown in Fig. 1b-d.

| Group               | POEGMA ID | EG2% by NMR | DP  | $M_w$ | $M_n$ | $\bar{D}(M_w/M_n)$ | $R_h$ (nm)    | $T_t$ (25 $\mu$ M; °C) |
|---------------------|-----------|-------------|-----|-------|-------|--------------------|---------------|------------------------|
| EG3 <sub>100%</sub> | P1        | 0           | 105 | 24.7  | 22.7  | 1.079              | 3.4 $\pm$ 0.6 | 51.6                   |
|                     | P2        | 0           | 194 | 45.3  | 40.3  | 1.123              | 4.6 $\pm$ 1.0 | 48.9                   |
|                     | P3        | 0           | 314 | 73.2  | 68.0  | 1.075              | 6.5 $\pm$ 1.4 | 46.7                   |
|                     | P4        | 0           | 386 | 90.0  | 84.7  | 1.063              | 6.7 $\pm$ 1.3 | 43.9                   |
| EG2 <sub>58%</sub>  | P5        | 58.4        | 95  | 19.9  | 18.3  | 1.088              | 3.0 $\pm$ 0.5 | 37.8                   |
|                     | P6        | 58.5        | 206 | 42.7  | 39.6  | 1.078              | 3.4 $\pm$ 0.4 | 35.8                   |
|                     | P7        | 59.0        | 285 | 59.1  | 53.1  | 1.113              | 4.8 $\pm$ 1.2 | 33.8                   |
|                     | P8        | 56.5        | 394 | 82.0  | 71.6  | 1.146              | 5.1 $\pm$ 0.4 | 31.7                   |
| EG2 <sub>66%</sub>  | P9        | 65.6        | 96  | 19.8  | 18.1  | 1.092              | 2.9 $\pm$ 0.3 | 35.2                   |
|                     | P10       | 65.0        | 201 | 41.2  | 38.6  | 1.066              | 3.2 $\pm$ 0.4 | 33.6                   |
|                     | P11       | 68.8        | 298 | 60.5  | 55.3  | 1.095              | 3.9 $\pm$ 0.3 | 31.8                   |
|                     | P12       | 65.0        | 389 | 79.5  | 69.4  | 1.145              | 5.3 $\pm$ 0.7 | 30.6                   |
| EG2 <sub>74%</sub>  | P13       | 72.0        | 104 | 21.1  | 19.3  | 1.091              | 3.1 $\pm$ 0.4 | 33.7                   |
|                     | P14       | 75.5        | 208 | 41.6  | 38.3  | 1.086              | 3.5 $\pm$ 0.3 | 32.0                   |
|                     | P15       | 76.5        | 313 | 62.5  | 55.7  | 1.122              | 4.6 $\pm$ 0.8 | 30.3                   |
|                     | P16       | 73.8        | 420 | 84.2  | 72.2  | 1.166              | 5.7 $\pm$ 1.1 | 28.7                   |
| EG2 <sub>82%</sub>  | P17       | 82.3        | 105 | 20.8  | 19.0  | 1.097              | 3.1 $\pm$ 0.7 | 32.6                   |
|                     | P18       | 82.0        | 195 | 38.4  | 34.9  | 1.099              | 3.8 $\pm$ 0.5 | 30.1                   |
|                     | P19       | 83.0        | 289 | 56.8  | 52.8  | 1.075              | 4.3 $\pm$ 0.5 | 28.8                   |
|                     | P20       | 82.3        | 404 | 79.4  | 67.7  | 1.173              | 5.9 $\pm$ 1.3 | 26.7                   |
| EG2 <sub>90%</sub>  | P21       | 89.6        | 103 | 20.1  | 18.2  | 1.102              | 3.0 $\pm$ 0.5 | 30.8                   |
|                     | P22       | 92.0        | 210 | 40.6  | 35.3  | 1.151              | 3.5 $\pm$ 0.3 | 28.9                   |
|                     | P23       | 90.0        | 315 | 61.0  | 55.2  | 1.105              | 4.1 $\pm$ 0.5 | 27.0                   |
|                     | P24       | 90.0        | 405 | 78.2  | 66.2  | 1.182              | 4.8 $\pm$ 0.4 | 25.0                   |
| EG2 <sub>100%</sub> | P25       | 100         | 190 | 36.0  | 32.3  | 1.116              | 3.1 $\pm$ 0.5 | 25.8                   |

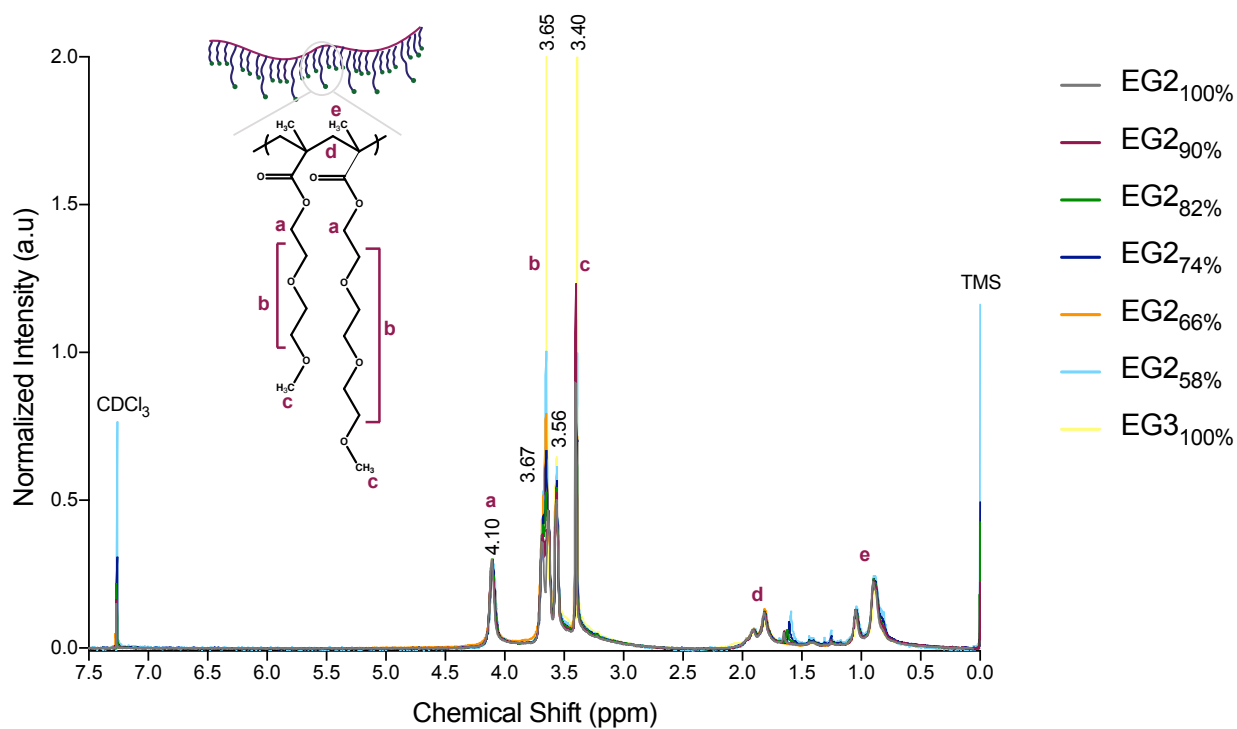

**Supplementary Figure 7. Structure of POEGMAs.** The POEGMA structure was identified by NMR spectroscopy at indicated monomer compositions for a DP of ~ 200. These polymers correspond to POEGMA IDs of P2, P6, P10, P14, P18, P22, and P25, shown in Supplementary Table 1. Data were acquired using a 400 MHz Varian Inova NMR spectrometer and analyzed using ACD/NMR software (ACD Labs). Deuterated chloroform (CDCl<sub>3</sub>) and TMS were used as the solvent and reference.

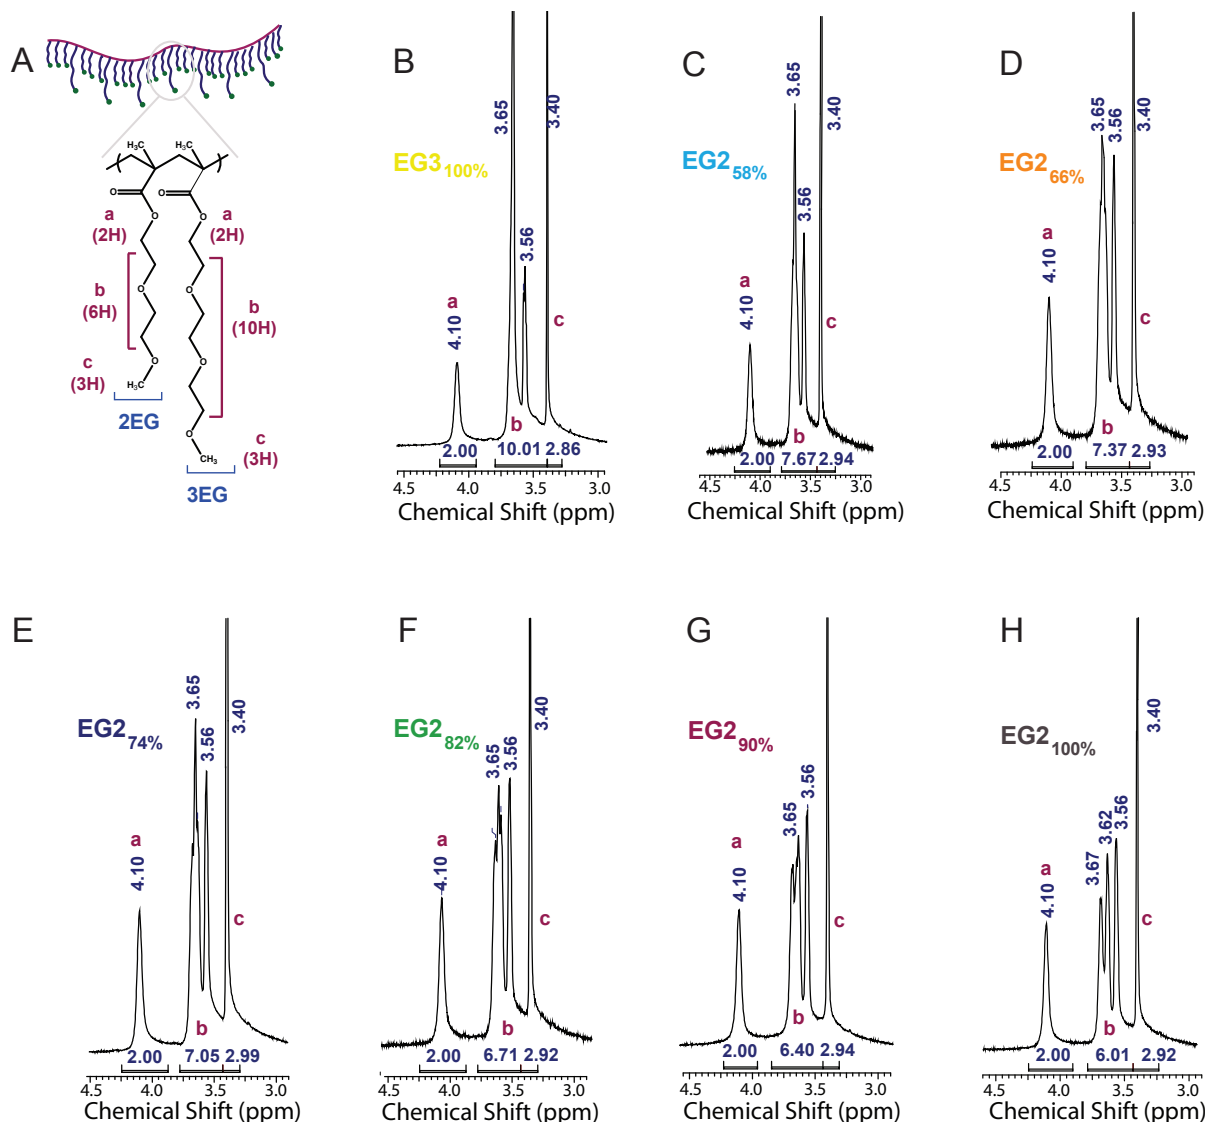

**Supplementary Figure 8. The monomer composition of the POEGMA library.** (A) Structure of a POEGMA copolymer. The monomer composition of (B) EG<sub>3</sub><sub>100%</sub>, (C) EG<sub>2</sub><sub>58%</sub>, (D) EG<sub>2</sub><sub>66%</sub>, (E) EG<sub>2</sub><sub>74%</sub>, (F) EG<sub>2</sub><sub>82%</sub>, (G) EG<sub>2</sub><sub>90%</sub> and (H) EG<sub>2</sub><sub>100%</sub>. These polymers correspond to POEGMA IDs of P2, P5, P9, P16, P17, P23, and P25 given in Supplementary Table 1, respectively. The monomer composition was defined as the percentage of EG2 (or EG3) content in the copolymer and characterized using NMR spectroscopy. The monomer composition was calculated from the integral value that corresponds to the average number of hydrogens (H) present in the OEG side-chain (b; 3.4-4.4 ppm; 6H for EG<sub>2</sub><sub>100%</sub> homopolymer; 10H for EG<sub>3</sub><sub>100%</sub> homopolymer) except chain end-group (c; 3.5-3.3 ppm; 3H) and methylene protons (a; 4.0-4.4 ppm; 2H).

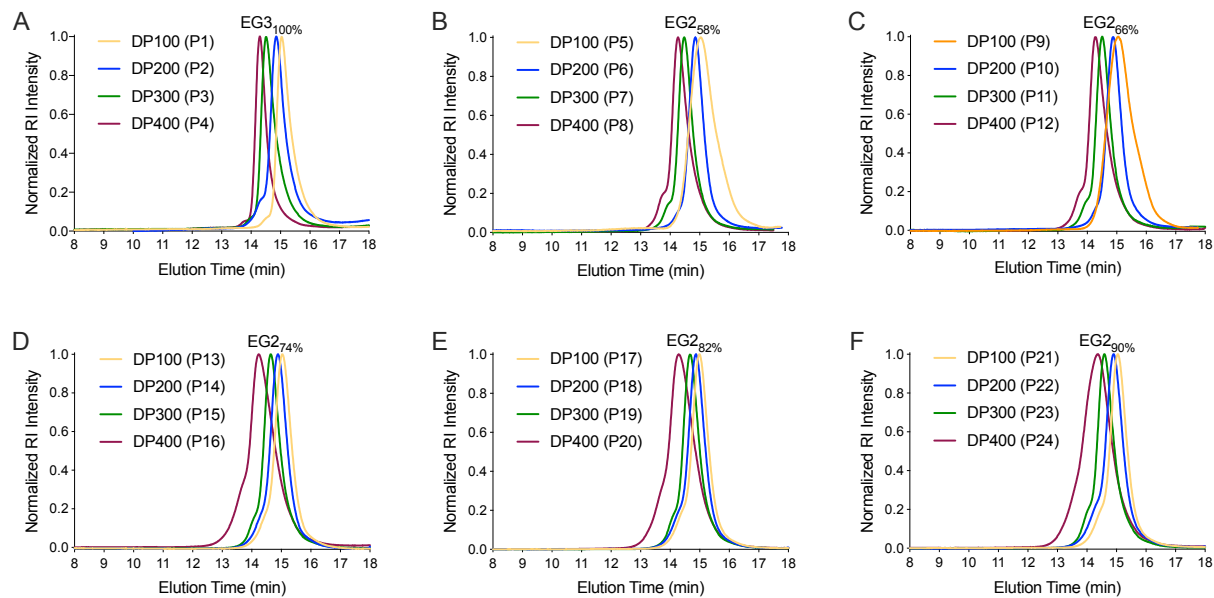

**Supplementary Figure 9. GPC traces of POEGMA library.** POEGMAs at indicated DP and compositions were separated on a GPC column. The refractive index (RI) signal at 658 nm was plotted as a function of the HPLC elution time.

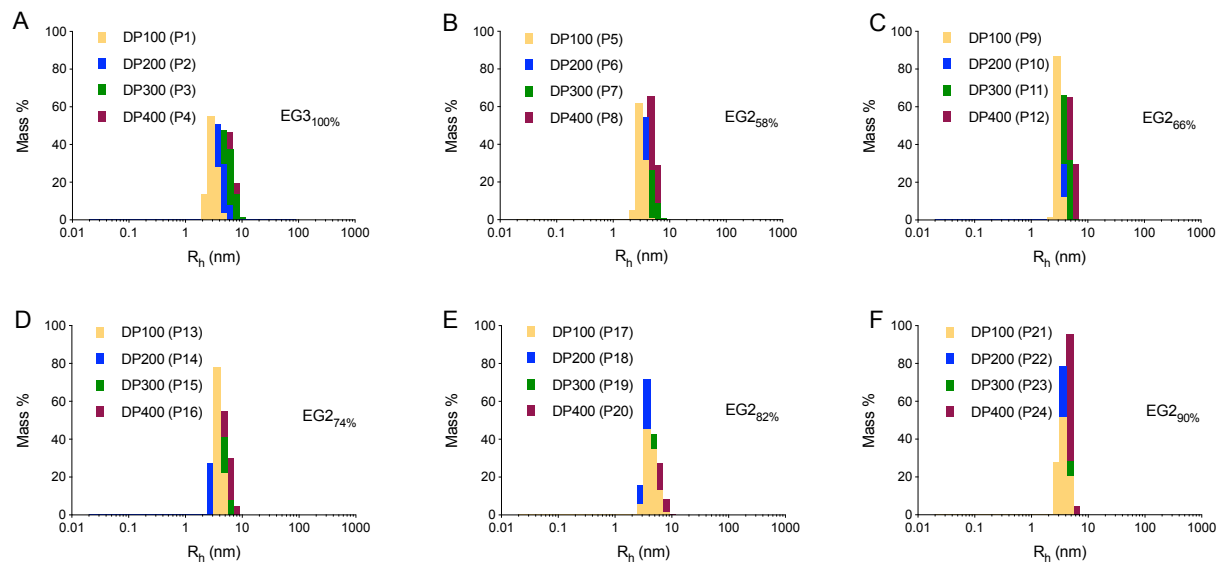

**Supplementary Figure 10. The  $R_h$  of the POEGMA library.** The  $R_h$  of **(A)** EG3<sub>100%</sub>, **(B)** EG2<sub>58%</sub>, **(C)** EG2<sub>66%</sub>, **(D)** EG2<sub>74%</sub>, **(E)** EG2<sub>82%</sub>, and **(F)** EG2<sub>90%</sub> were characterized at varying DP by DLS on a temperature-controlled DynaPro Plate Reader (Wyatt Technologies).

109 **Section 2. Synthesis and characterization of site-specific and stoichiometric exendin conjugates.**

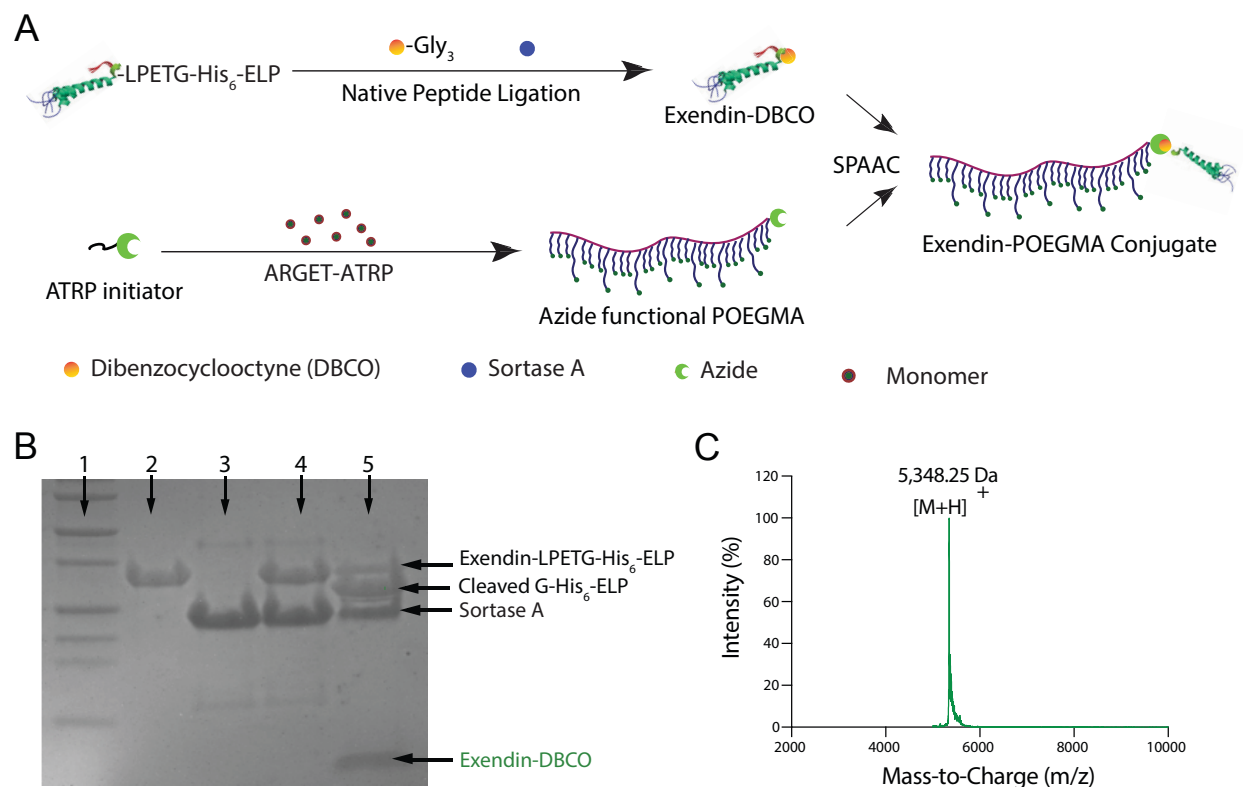

110  
 111 **Supplementary Figure 11. Synthesis of site-specific and stoichiometric exendin-POEGMA conjugates. (A)** Overview of site-  
 112 specific and stoichiometric Ex-POEGMA conjugation approach. The bio-orthogonal DBCO group is installed on the C-terminus of  
 113 exendin by sortase-A mediated native peptide ligation. Sortase A recognizes the LPETG sequence in the exendin-LPETG-His<sub>6</sub>-ELP  
 114 fusion, where ELP is an elastin-like polypeptide, and catalyzes a transpeptidation reaction using DBCO-terminated triglycine,  
 115 yielding exendin-DBCO. A bio-orthogonal azide group is installed on POEGMA using an azide functional polymerization initiator  
 116 in ARGET-ATRP. Strain-promoted azide-alkyne cycloaddition is then used to synthesize exendin-POEGMA conjugates. **(B)**  
 117 Coomassie-stained SDS-PAGE analysis of DBCO conjugation to exendin by sortase A. Lane 1: *M<sub>w</sub>* ladder; lane 2: exendin-LPETG-  
 118 His<sub>6</sub>-ELP; lane 3: sortase A; lane 4: reaction mixture immediately after mixing exendin-LPETG-His<sub>6</sub>-ELP with sortase A; lane 5:  
 119 reaction mixture after 18 h of reaction. **(C)** Exendin-DBCO was analyzed by MALDI-TOF-MS in the positive ion mode. Sinapinic  
 120 acid was used as the matrix, and insulin and aldolase were used as standards for MALDI-TOF-MS. The major peak at 5,348.25 Da  
 121 was assigned to the [M+H]<sup>+</sup> ion based on the theoretical mass (M) of exendin-DBCO of 5,347.47 Da.

122 *Characterization of exendin-POEGMA conjugates with varied  $T_t$  and near-constant  $M_w$ .*

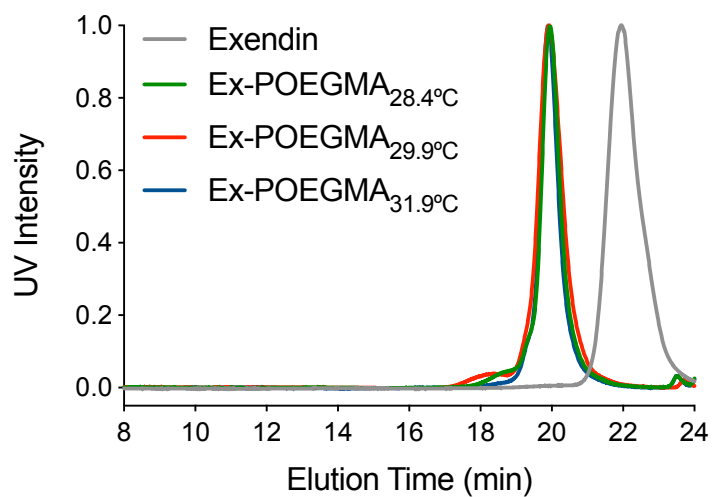

123

124 **Supplementary Figure 12. SEC traces of exendin-POEGMA conjugates with varied  $T_t$  and near-constant  $M_w$ .** The conjugates

125 were separated by HPLC on a SEC column.



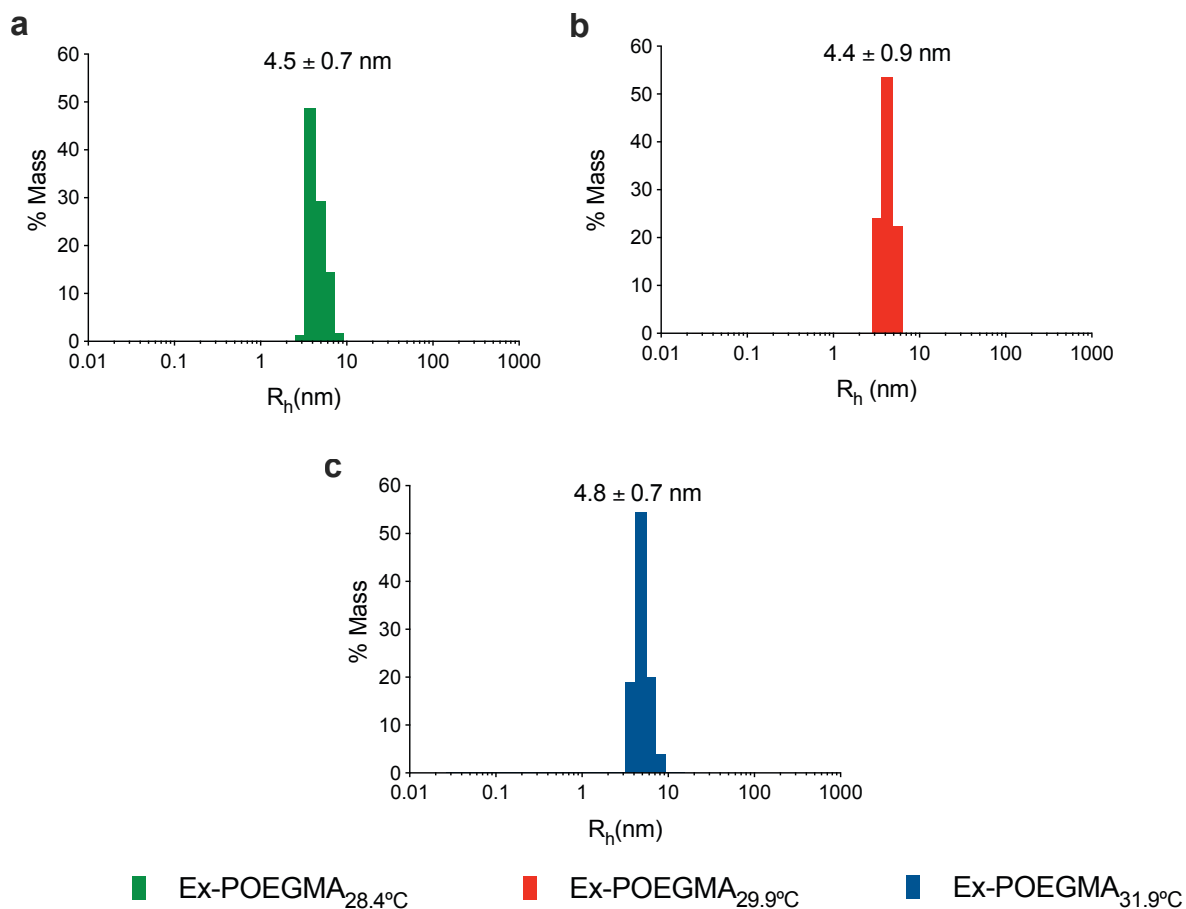

**Supplementary Figure 13. The  $R_h$  of exendin-POEGMA conjugates with varied  $T_t$  and near-constant  $M_w$ . The  $R_h$  of (A) Ex-POEGMA<sub>28.4°C</sub>, (B) Ex-POEGMA<sub>29.9°C</sub>, (C) Ex-POEGMA<sub>31.9°C</sub> was characterized by DLS on a temperature-controlled DynaPro Plate Reader (Wyatt Technologies).**

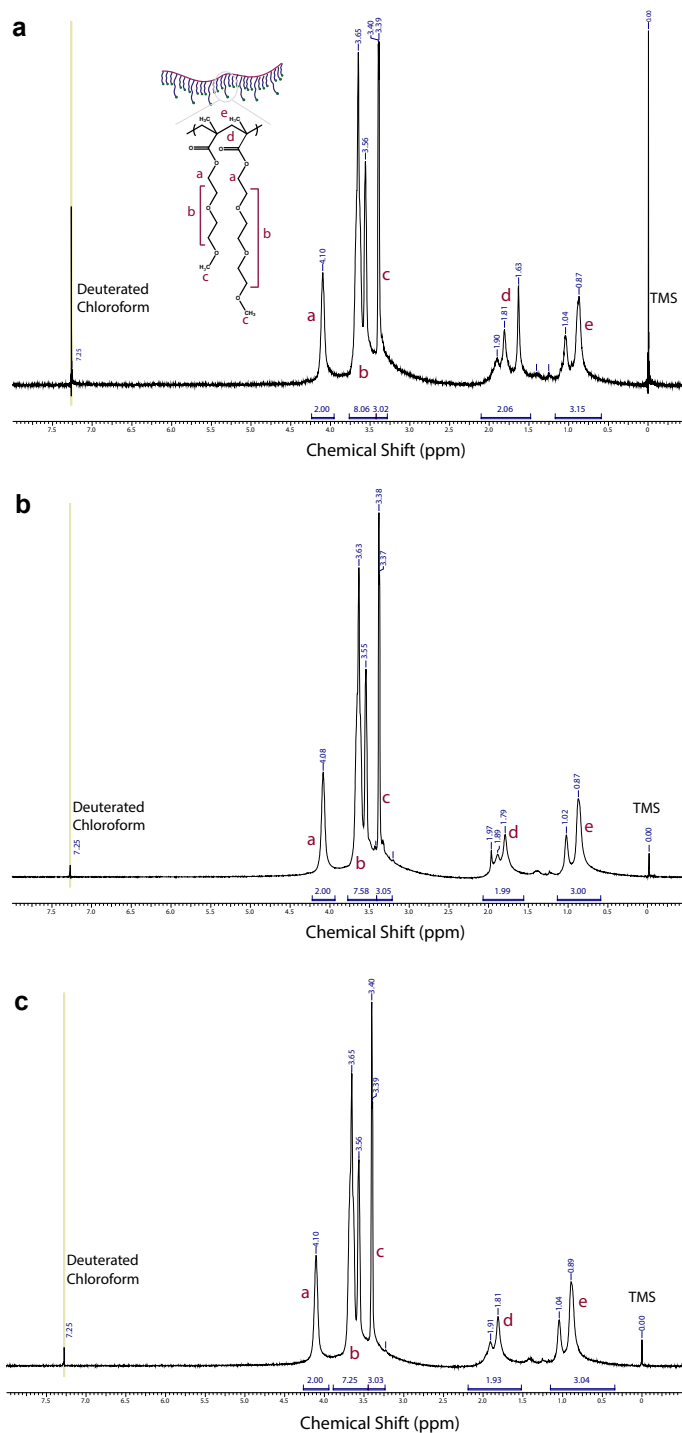

**Supplementary Figure 14. NMR spectra of POEGMAs used to synthesize Ex-POEGMA conjugates with varied  $T_i$  and near-constant  $M_w$ .** Structure of POEGMAs used to synthesize **(A)** Ex-POEGMA<sub>31.9°C</sub>, **(B)** Ex-POEGMA<sub>29.9°C</sub>, and **(C)** Ex-POEGMA<sub>28.4°C</sub>. Data were acquired using a 400 MHz Varian Inova spectrometer using deuterated chloroform as a solvent and TMS as a reference. Data were analyzed using ACD/NMR software (ACD Labs).

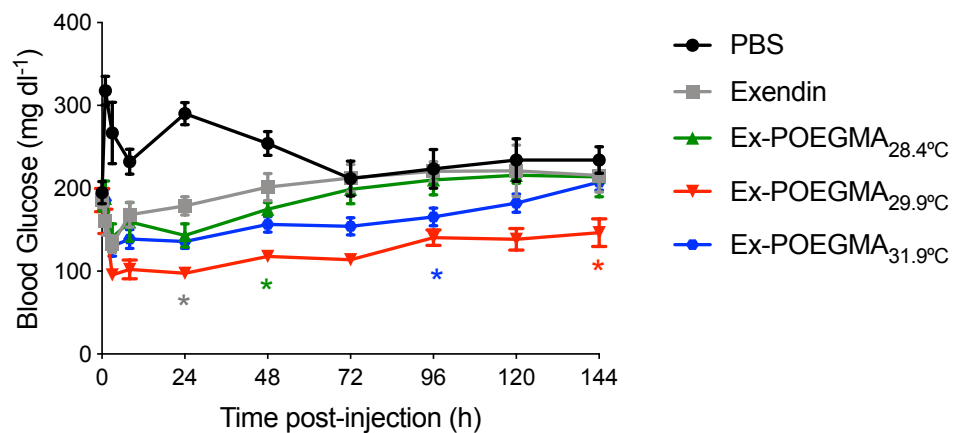

**Supplementary Figure 15. Raw fed blood glucose of mice treated with Ex-POEGMA conjugates with similar  $M_w$  but varied  $T_t$ .**

Fed blood glucose was monitored after treating 11-week-old male DIO C57BL/6J mice ( $n=6$ ) with a single s.c. injection of Ex-POEGMA conjugates with similar  $M_w$  but varied  $T_t$ . Data were analyzed by two-way repeated-measures ANOVA followed by *post hoc* Dunnett's multiple comparison test. \*The last time point that blood glucose for treatment is significantly lower than that of PBS treated mice. Data showed the mean  $\pm$  SEM and was considered statistically significant when  $p<0.05$ .

141 *Characterization of exendin-POEGMA conjugates with optimal  $T_t$  and varying  $M_w$ .*

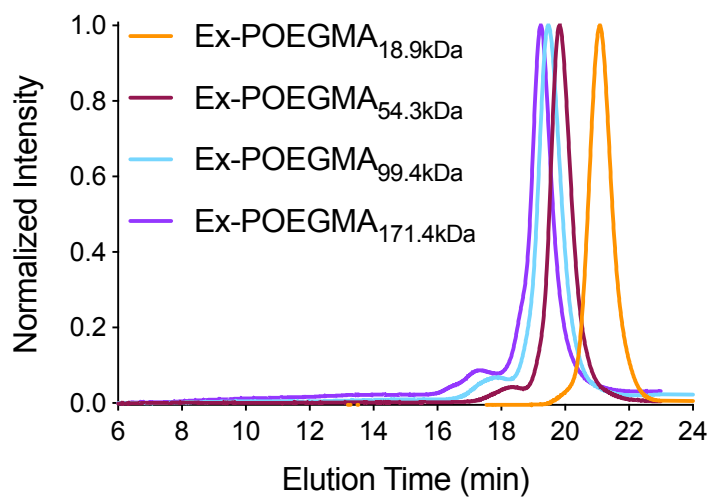

142

143 **Supplementary Figure 16. SEC traces of Ex-POEGMA conjugates with optimal  $T_t$  and varying  $M_w$ .** The conjugates were separated

144 by HPLC on a SEC column.

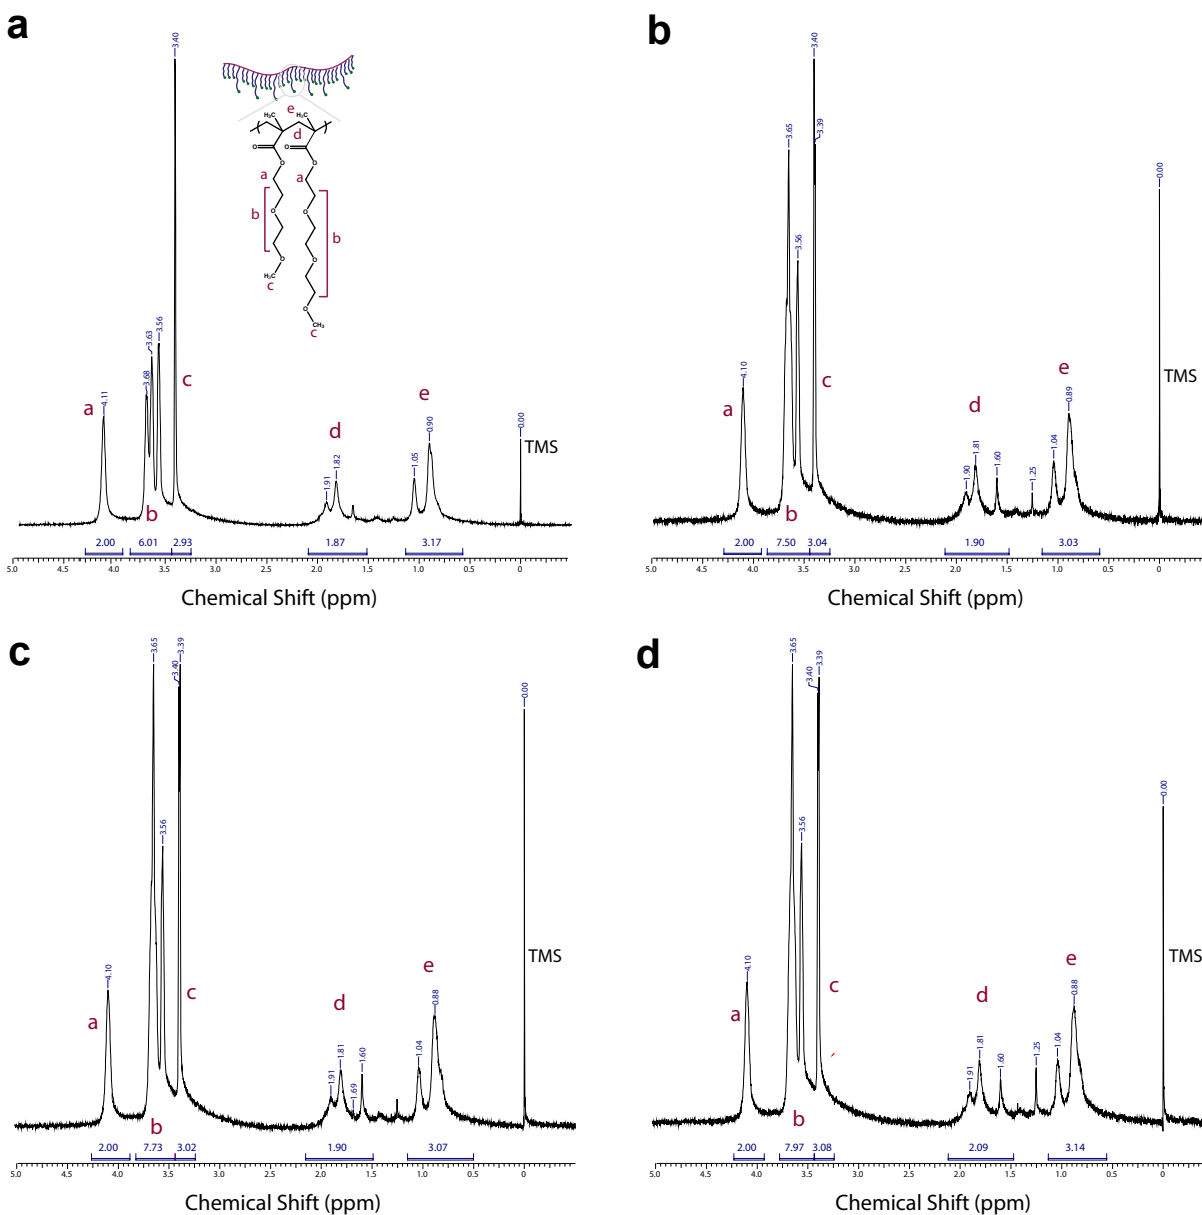

**Supplementary Figure 17. NMR spectra of POEGMAs used in the synthesis of Ex-POEGMA conjugates with optimal  $T_i$  and varying  $M_w$ . Structure of POEGMAs used to synthesize (A) Ex-POEGMA<sub>18.9kDa</sub>, (B) Ex-POEGMA<sub>54.3kDa</sub>, (C) Ex-POEGMA<sub>99.4kDa</sub>, and (D) Ex-POEGMA<sub>171.4kDa</sub>. Data were acquired using a 400 MHz Varian Inova spectrometer using deuterated chloroform as a solvent and TMS as a reference. Data were analyzed using ACD/NMR software (ACD Labs).**

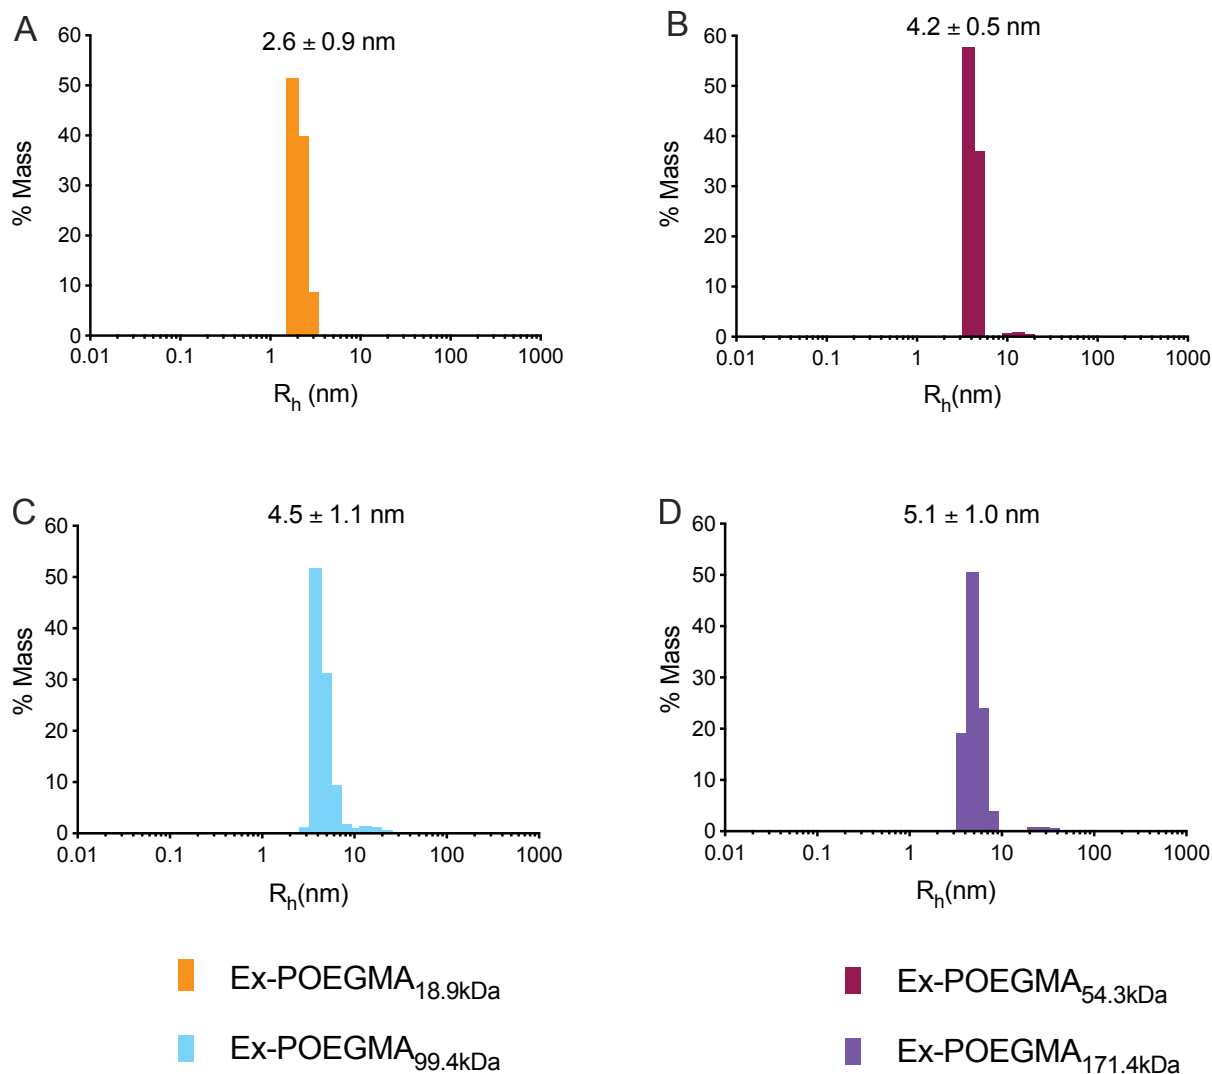

**Supplementary Figure 18. The  $R_h$  of Ex-POEGMA conjugates with optimal  $T_t$  and varying  $M_w$ .** The  $R_h$  of (A) Ex-POEGMA<sub>18.9kDa</sub>, (B) Ex-POEGMA<sub>54.3kDa</sub>, (C) Ex-POEGMA<sub>99.4kDa</sub>, and (D) Ex-POEGMA<sub>171.4kDa</sub> was characterized by DLS on a temperature-controlled DynaPro Plate Reader (Wyatt Technologies).

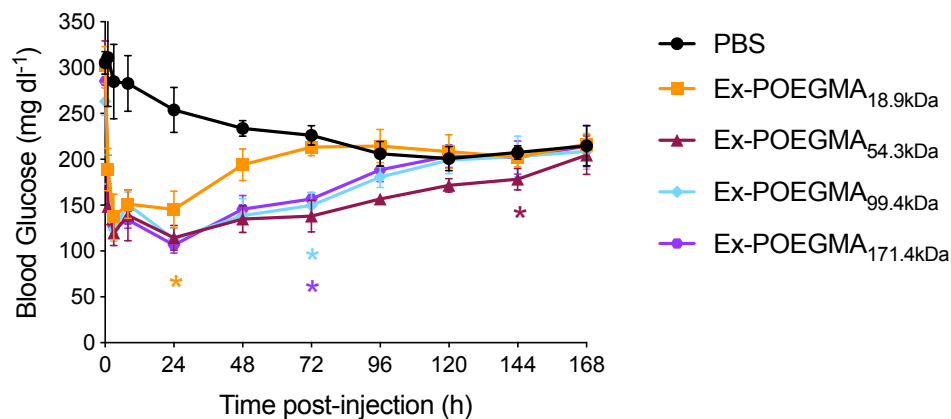

**Supplementary Figure 19. Raw fed blood glucose of mice treated with Ex-POEGMA conjugates with varying  $M_w$  but optimal  $T_t$ .** Fed blood glucose was monitored after treating 11-week-old male DIO C57BL/6J mice ( $n=6$ ) with a single s.c. injection of Ex-POEGMA conjugates. Data were analyzed by two-way repeated-measures ANOVA followed by *post hoc* Dunnett's multiple comparison test. \*The last time point that blood glucose for treatment is significantly lower than that of PBS treated mice. Data showed the mean  $\pm$  SEM and was considered statistically significant when  $p<0.05$ .

**Dose optimization of Ex-POEGMA<sub>opt</sub>.** In the dose optimization study, varied doses of Ex-POEGMA<sub>opt</sub> were injected s.c into 11-week-old male DIO C57BL6/J mice ( $n=5$ ) that were kept on a 60 kilocalorie % fat diet for five weeks before the study. The injection concentration (500  $\mu$ M) and volume (120  $\mu$ l) were kept constant across groups to prevent differences in  $T_t$  by keeping the volume of lower dose injections the same as that of the highest dose by adding free POEGMA to make up the difference in volume (500  $\mu$ M). The fed blood glucose level and body weight (data not shown) were measured at 1-, 4-, 8-, 24-, 48-, 72-, 96-, 120-, 144- and 168 h post-injection, as described in the Methods. Larger injection doses of the conjugate resulted in more extended blood glucose control. Because an injection dose of 1500 nmol kg<sup>-1</sup> did not provide any additional benefit, 1000 nmol kg<sup>-1</sup> was chosen as the optimal injection dose.

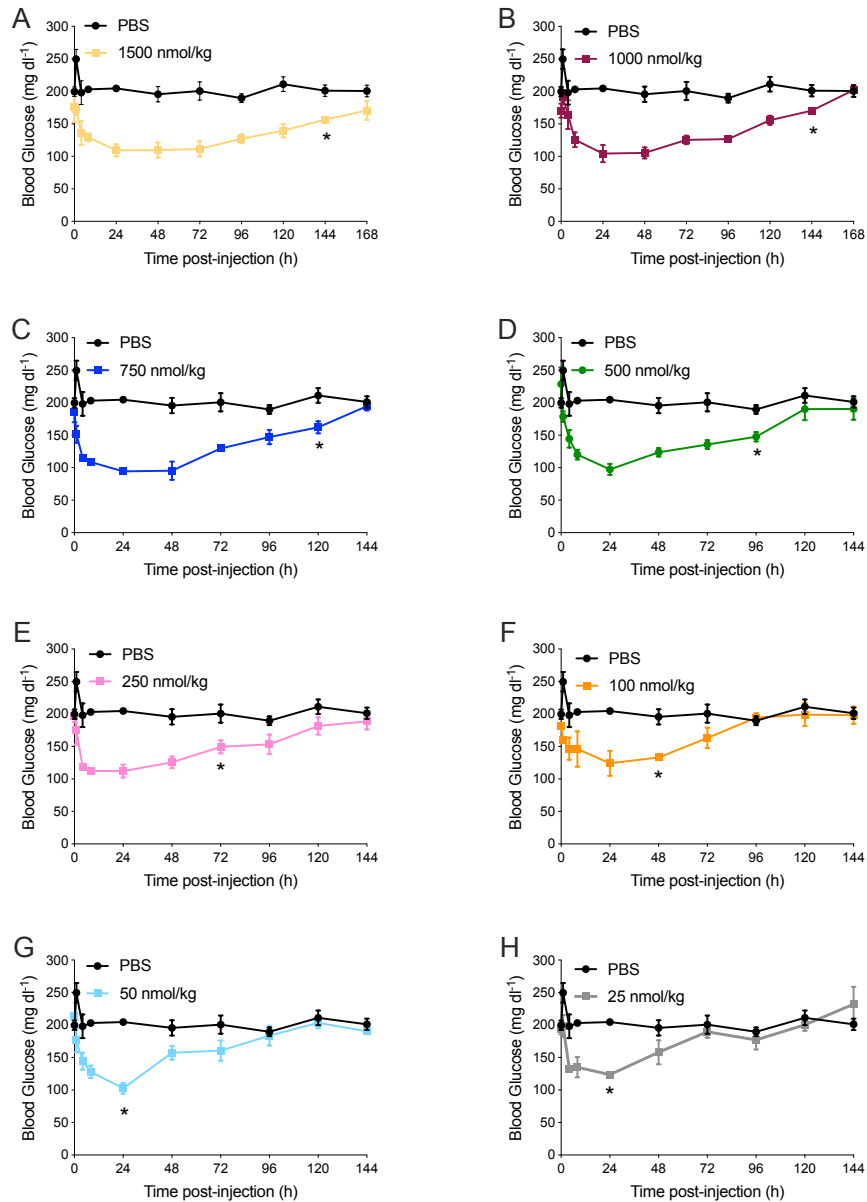

**Supplementary Figure 20. Dose optimization of Ex-POEGMA<sub>opt</sub>.** (A) 1500, (B) 1000, (C) 750, (D) 500, (E) 250, (F) 100, (G) 50, and (H) 25 nmol kg<sup>-1</sup> bodyweight doses of Ex-POEGMA<sub>opt</sub> were injected s.c. into 11-week-old male DIO C57BL6/J mice ( $n=5$ ). Fed blood glucose levels was measured at 1-, 4-, 8-, 24-, 48-, 72-, 96-, 120-, 144- and 168 h post-injection, as described in the Methods. Data were analyzed by two-way repeated-measures ANOVA followed by *post hoc* Dunnett's multiple comparison test. \*The last time point that blood glucose for treatment is significantly lower than that of PBS treated mice. Data showed the mean  $\pm$  SEM and was considered statistically significant when  $p<0.05$ .



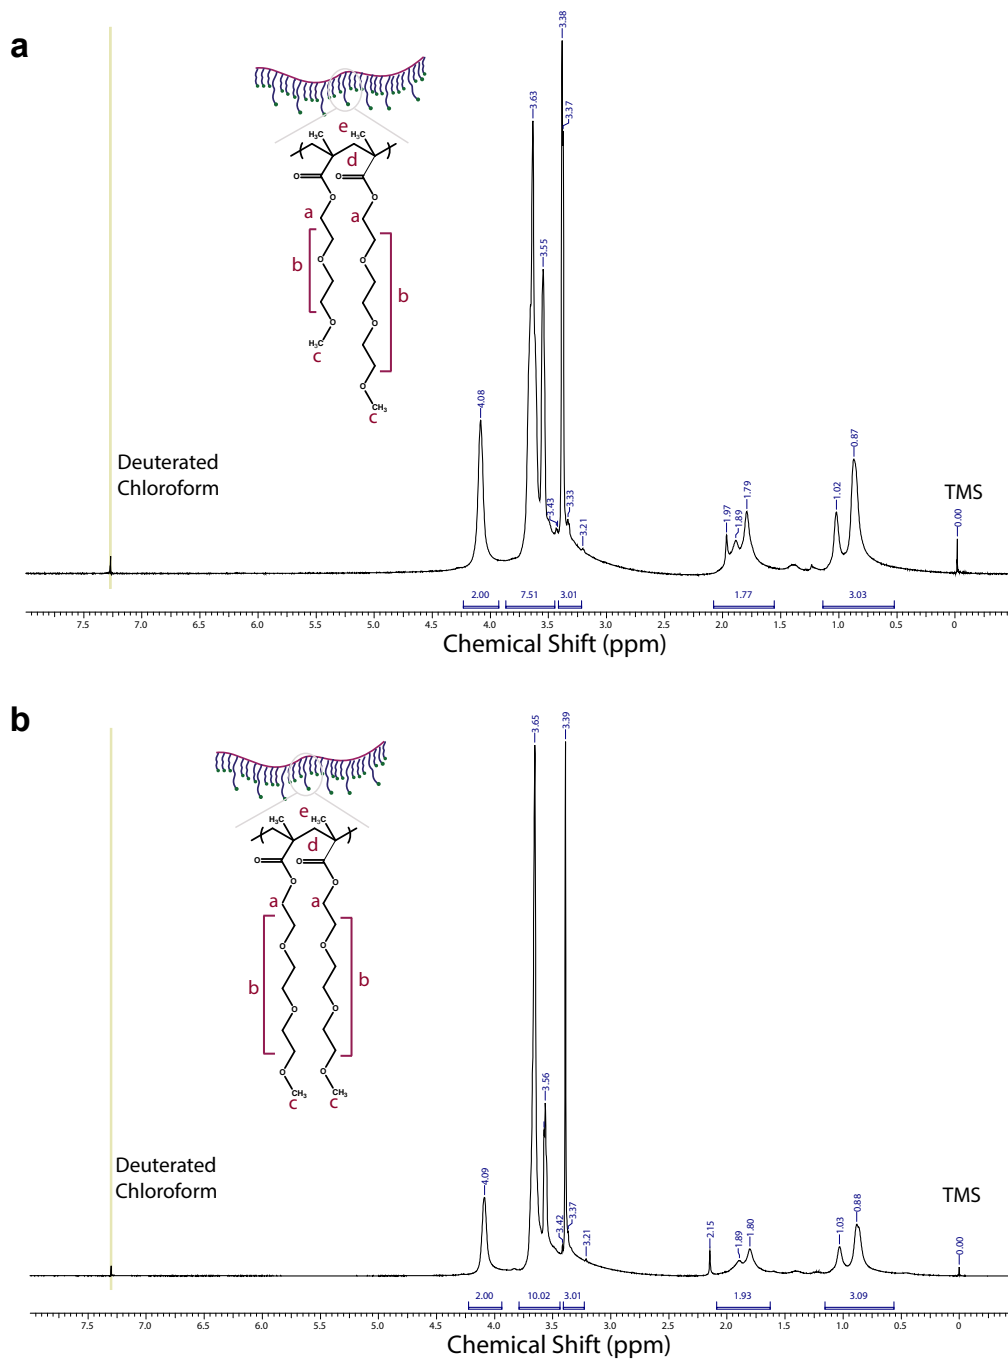

177

178 **Supplementary Figure 21. NMR spectra of POEGMAs used for the synthesis of the depot-forming and soluble exendin-POEGMA**

179 **conjugates.** Structural analysis of POEGMAs used in the synthesis of **(A)** Ex-POEGMA<sub>opt</sub> and **(B)** Ex-POEGMA<sub>sol</sub>. Data were acquired

180 using a 400 MHz Varian Inova spectrometer using deuterated chloroform as a solvent and TMS as a reference. Data were analyzed

181 using ACD/NMR software (ACD Labs).

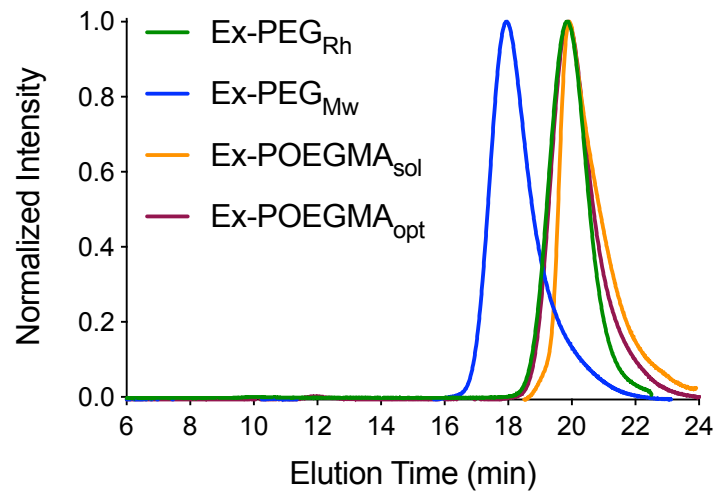

182

183 **Supplementary Figure 22. SEC traces of PEG and POEGMA conjugates of exendin.** The conjugates were separated by HPLC on a

184 SEC column.

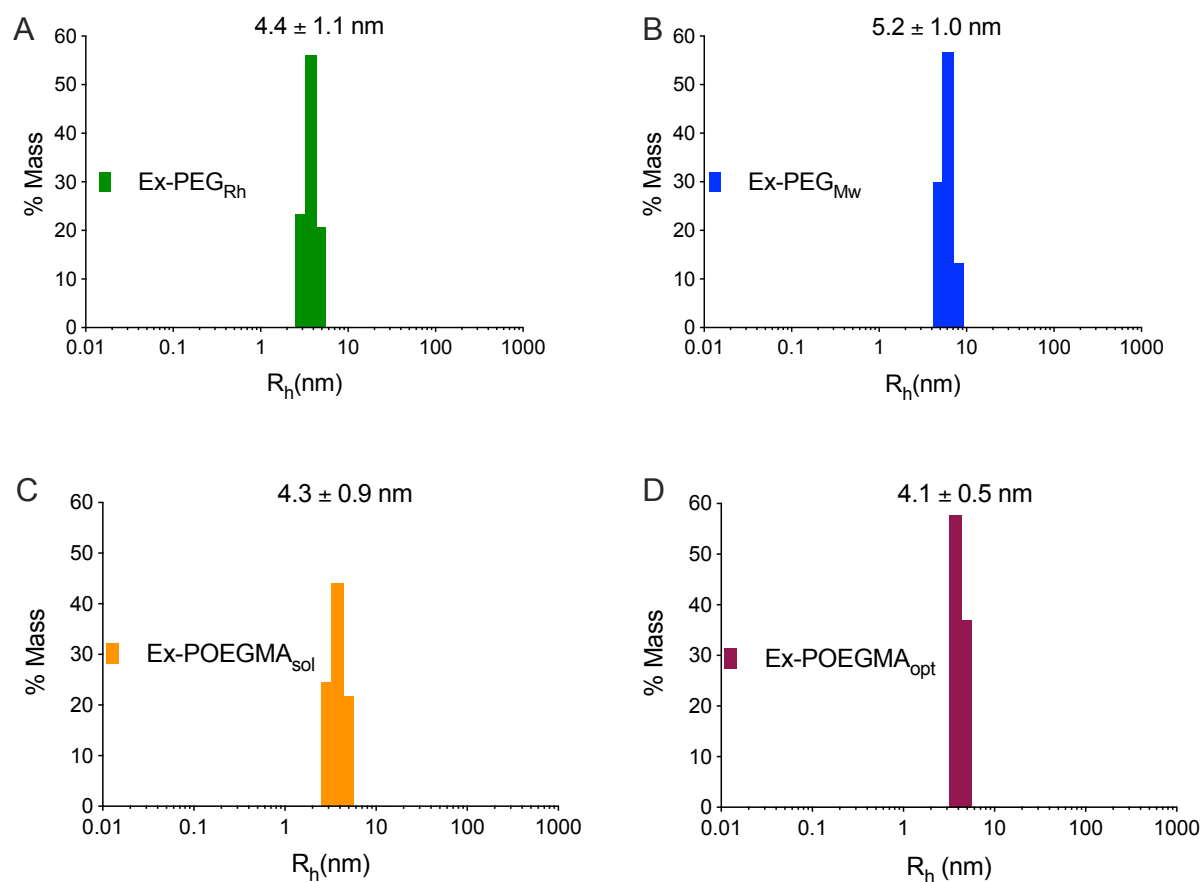

185

186 **Supplementary Figure 23. The  $R_h$  of PEG and POEGMA conjugates of exendin.** The  $R_h$  of **(A)** Ex-PEG<sub>Rh</sub>, **(B)** Ex-PEG<sub>Mw</sub>, **(C)** Ex-  
 187 POEGMA<sub>sol</sub>, and **(D)** Ex-POEGMA<sub>opt</sub> was characterized by DLS on a temperature-controlled DynaPro Plate Reader (Wyatt  
 188 Technologies).

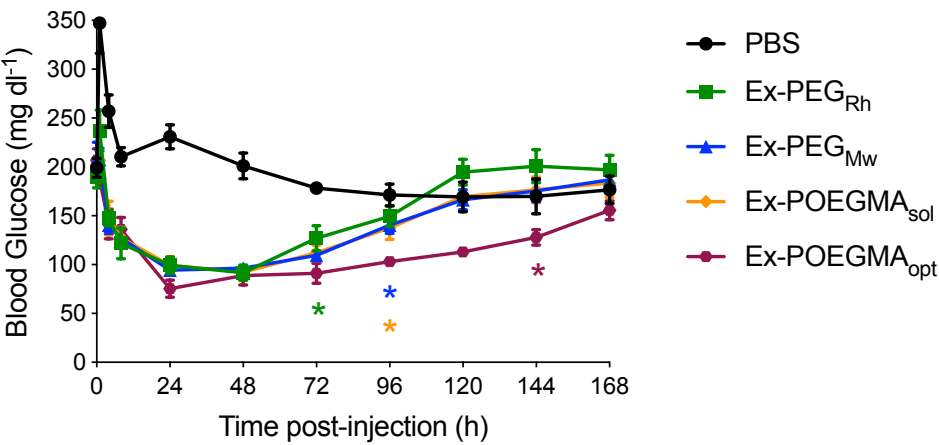

190

191      **Supplementary Figure 24. Raw fed blood glucose of mice treated with the depot-forming Ex-POEGMA<sub>opt</sub> and its soluble**

192      **POEGMA and PEG counterparts.** Fed blood glucose was monitored after treating 11-week-old male DIO C57BL/6J mice (*n*=6) with

193      a single s.c. injection of Ex-POEGMA<sub>opt</sub>, Ex-POEGMA<sub>sol</sub>, Ex-PEG<sub>Rh</sub>, and Ex-PEG<sub>Mw</sub>. Data were analyzed by two-way ANOVA followed

194      by *post hoc* Dunnett's multiple comparison test. \*The last time point that blood glucose for treatment is significantly lower than

195      that of PBS treated mice. Data showed the mean ± SEM and was considered statistically significant when *p*<0.05.

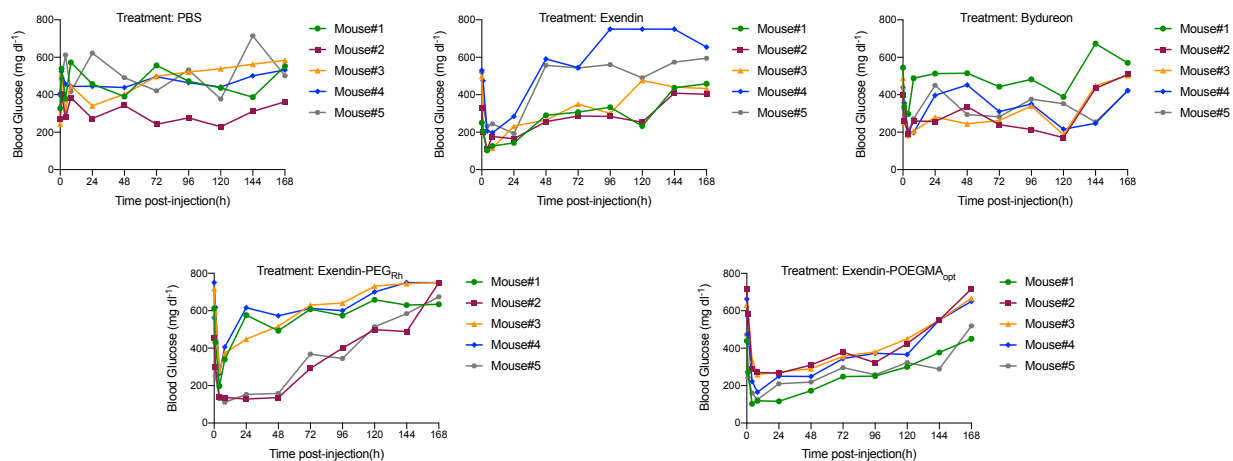

**Supplementary Figure 25. Individually plotted raw fed blood glucose of short-term-treated *db/db* mice.** 6-week-old *db/db* mice ( $n=5$ ) received a single s.c. injection of (A) PBS, (B) exendin, (C) Bydureon, (D) Ex-PEG<sub>Rh</sub>, and (E) Ex-POEGMA<sub>opt</sub>. Fed blood glucose was measured as described in the Methods.

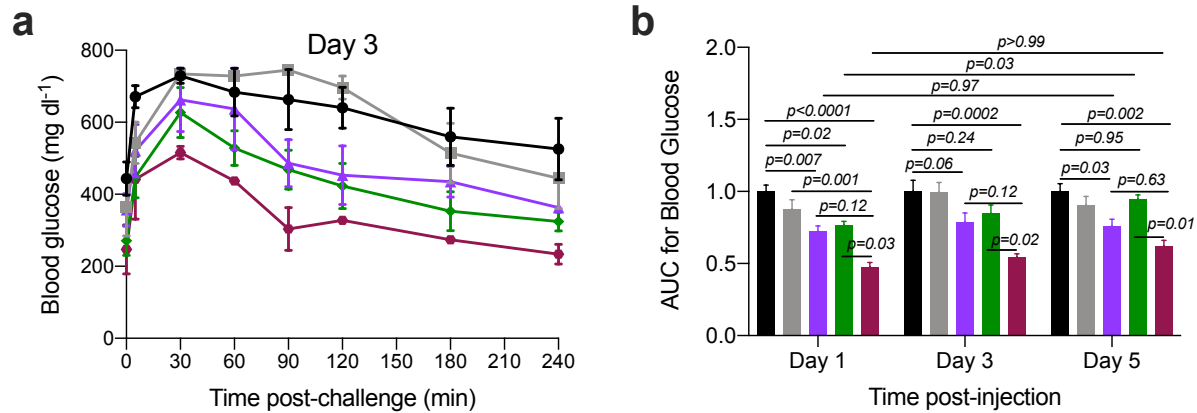

**Supplementary Figure 26. Ex-POEGMA<sub>opt</sub> outperforms its PEG counterpart and a clinical sustained-release exendin formulation, Bydureon, in providing glycemic control.** An *i.p.* glucose challenge was performed at **(A)** day 1, **(B)** day 3, and **(C)** day 5 post-injection of treatments. 1500 g per kg body weight glucose was administered *s.c.* into 6-week-old *db/db* mice (*n*=5), followed by monitoring their blood glucose. **(B)** AUC of blood glucose was quantified and is reported by the day it was measured after administration of the drug. Data represent the mean and standard error of the mean (SEM). Data were analyzed by two-way repeated-measures ANOVA, followed by *post-hoc* Tukey's multiple comparison test. Data were considered statistically significant when *p*<0.05.



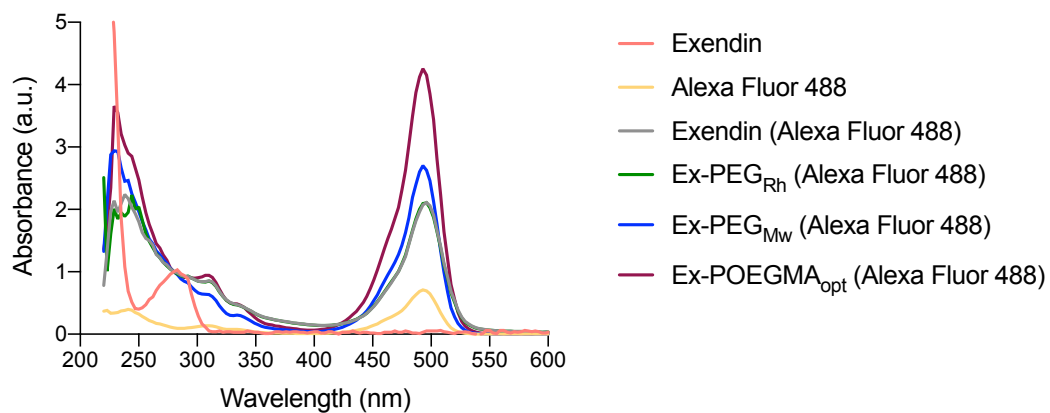

216

217 **Supplementary Figure 28. UV-vis absorbance spectrum of fluorescently labeled treatments used in the pharmacokinetics**

218 **experiment.** Exendin variants were reacted with an amine-functionalized Alexa Fluor 488, followed by purification of the

219 conjugate by gel filtration. UV-vis absorbance spectra of the fluorophore conjugate of the exendin variants were measured on a

220 Nanodrop spectrometer using unmodified exendin as a negative control and Alexa Fluor 488 as a positive control.



Section 4. Long-term efficacy

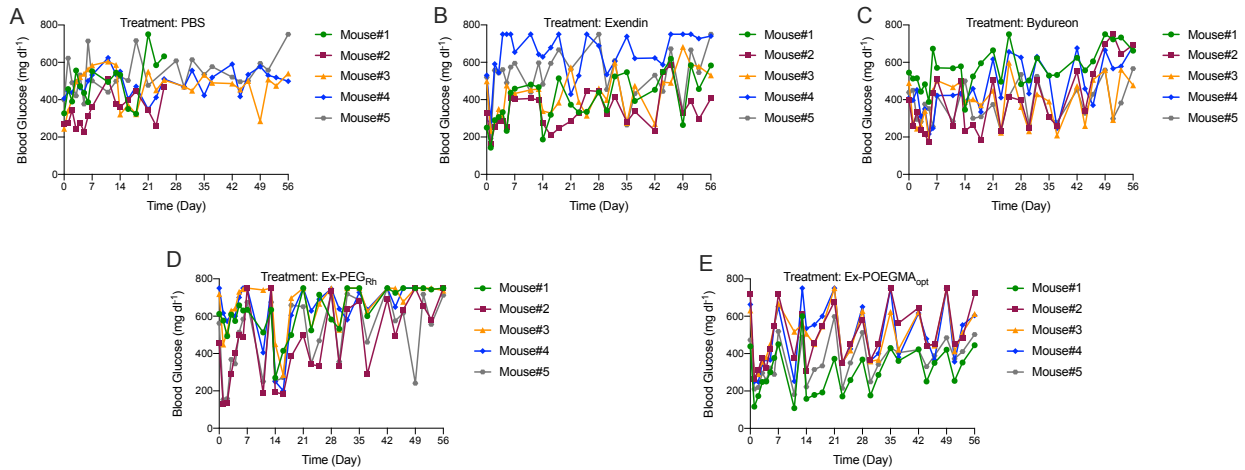

**Supplementary Figure 29. Individually plotted raw fed blood glucose of long-term-treated *db/db* mice.** 6-week-old *db/db* mice ( $n=5$ ) received weekly s.c. injections of (A) PBS, (B) exendin, (C) Bydureon, (D) Ex-PEG<sub>Rh</sub>, and (E) Ex-POEGMA<sub>opt</sub> for eight weeks. Fed blood glucose was measured as described in the Methods. Mice #1 and #2 in the PBS group died due to cage flooding on Day 28. Mouse#4 in the Ex-PEG<sub>Rh</sub> group was found dead on Day 51.

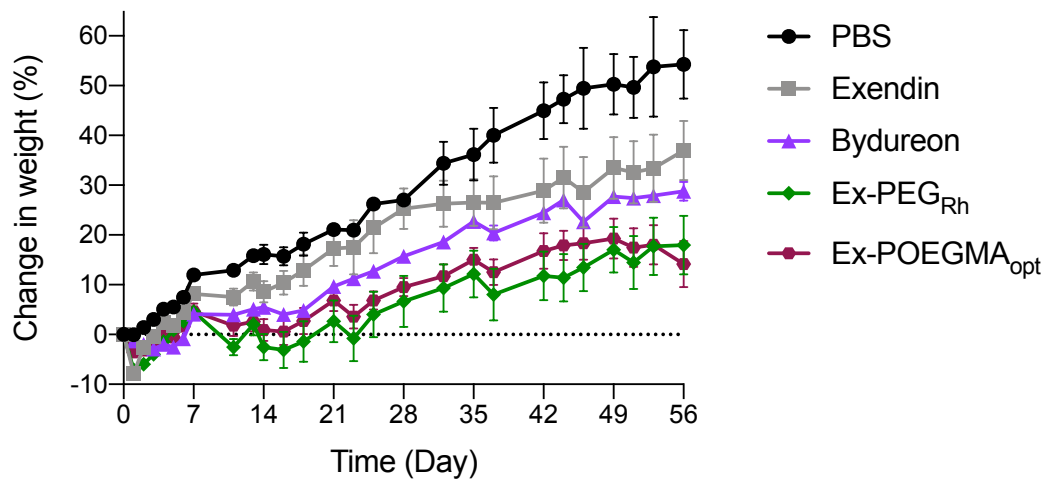

227

228

**Supplementary Figure 30. Change in body weight of long-term-treated *db/db* mice.** 6-week-old *db/db* mice ( $n=5$ ) received

229

weekly s.c. injections of PBS, exendin, Bydureon, Ex-PEG<sub>Rh</sub>, and Ex-POEGMA<sub>opt</sub> for eight weeks. Weight was tracked every other

230

day.

## Section 5. Immunogenicity

### Design, optimization, and validation of a Luminex multiplexed immunoassay (LMI).

Assay Design. We designed an assay to assess the titer, specificity (anti-protein/peptide, anti-PEG, or anti-POEGMA), and subtype (IgM or IgG) of ADAs using a LMI platform. The LMI platform uses drug or drug-polymer conjugates that are covalently coupled to fluorescently barcoded magnetic beads to capture ADAs. We conjugated exendin, exendin-PEG, and exendin-POEGMA and their OVA counterparts—OVA, OVA-PEG, OVA-POEGMA—to different sets of fluorescently barcoded magnetic beads. This bead design allowed us to determine the specificity of the ADAs, such that if exendin-PEG-treated mice plasma results in a positive signal for the exendin-PEG- and OVA-PEG-conjugated bead sets but not for the exendin-conjugated bead set, that would give a clear indication that the ADAs are PEG-specific and not protein specific.

Drug synthesis, purification, and characterization for bead coupling. Due to the steric effects of high  $M_w$  POEGMA and PEG used in the optimal conjugate synthesis on the bead coupling efficiency, we synthesized exendin and OVA conjugates of PEG and POEGMA for bead coupling using polymers with an  $M_w$  of ~10 kDa, yielding exendin-PEG<sub>10K</sub>, exendin-POEGMA<sub>10K</sub>, OVA-PEG<sub>10K</sub>, and OVA-POEGMA<sub>10K</sub>. Exendin-PEG<sub>10K</sub> and exendin-POEGMA<sub>10K</sub> conjugates were synthesized, purified, and characterized, as described in Methods with minor modifications. Briefly, azide functional, linear PEG was purchased from Creative PEGWorks. Azide functional POEGMA was synthesized by reacting the EG3 monomer (2.5 mmol; 565.4  $\mu$ L), the catalytic complex (0.1 mmol TPMA and 0.01 mmol CuBr<sub>2</sub>; 62.5  $\mu$ L), the polymerization initiator (62.5  $\mu$ L in methanol; 0.01 mmol) in a mixture of methanol (1437.5  $\mu$ L) and 100 mM NaCl (4432.8  $\mu$ L) for 2 hours. Exendin-PEG<sub>10K</sub> and exendin-POEGMA<sub>10K</sub> conjugates were analyzed for  $M_n$ ,  $M_w$ , and  $\bar{D}$  using SEC-MALS (**Supplementary Fig. 31a; Supplementary Table 2**).

OVA conjugates of PEG and POEGMA were synthesized via activated carbonate-amine conjugation. Nitrophenyl-carbonate (NPC) functional PEG was purchased from Creative PEGWorks. A hydroxyl functional POEGMA was synthesized by reacting EG3 (10 mmol; 2261.6  $\mu$ L), the catalytic complex (0.08 mmol TPMA and 0.01 mmol  $\text{CuBr}_2$ ; 100  $\mu$ L), 2-Hydroxyethyl 2-bromoisobutyrate (Sigma) (200  $\mu$ L in methanol; 0.04 mmol) in a mixture of methanol (5.800 mL) and 100 mM NaCl (11.638 mL) for 1.5 h. The resulting hydroxyl-functional POEGMA (5 mM in DCM) was reacted with p-nitrophenyl carbonate (100 mM in DCM) in the presence of pyridine (240 mM in DCM) for 16 h to convert the hydroxyl end-group to an NPC. The resulting NPC-functional POEGMA was purified via filtration followed by diethyl ether precipitation. NPC functionalization yield was 79.7%, calculated by nuclear magnetic resonance (NMR) spectroscopy. NPC functional POEGMA and PEG were reacted with OVA (Invivogen; 2 mg  $\text{ml}^{-1}$ ) at a 10: 1 molar ratio for 5 h in 200 mM phosphate buffer at pH 8, yielding OVA-PEG<sub>10K</sub> and OVA-POEGMA<sub>10K</sub> conjugates. The resulting conjugates were purified by anion exchange chromatography to > 98% purity using 20 mM sodium phosphate buffer at pH 8.6 with a NaCl gradient of 0-50% and were then desalted and lyophilized. The conjugates were analyzed for  $M_n$ ,  $M_w$ , and  $\bar{D}$  using SEC-MALS (**Supplementary Fig. 31b; Supplementary Table 2**).

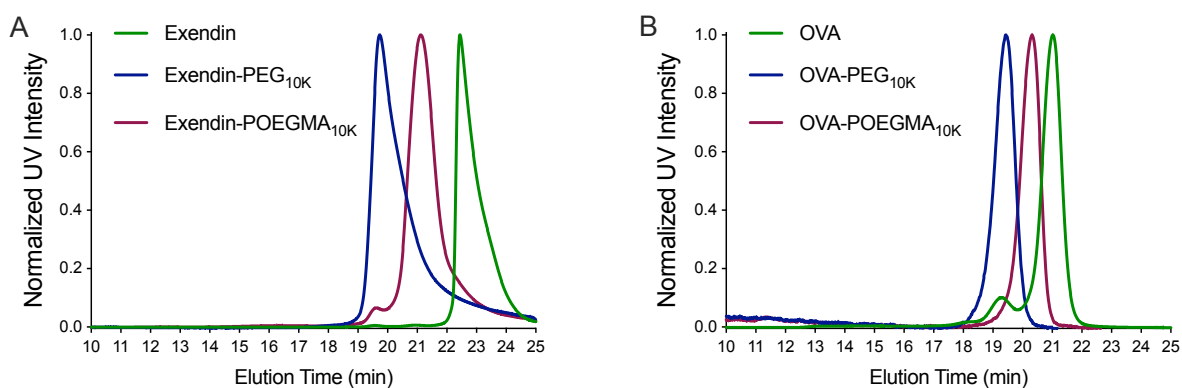

**Supplementary Figure 31. SEC traces of the drugs used for the bead coupling.** The conjugates were separated on a Shodex KW 803 SEC-HPLC column using 10 mM phosphate buffer (pH 7.2) as a mobile phase. The flow rate was 0.5  $\text{ml min}^{-1}$ .

**Supplementary Table 2. Characterization of drugs used in bead coupling.**  $M_w$  and  $\bar{D}$  values were determined by SEC-MALS. The data summarized here is shown in Supplementary Figure 32. Subscript shows the  $M_w$  of the polymer used in the synthesis of the conjugate. Conjugation stoichiometry was defined as the number of polymer chains per peptide or protein and was calculated using ASTRA (Wyatt Technology). The  $R_h$  was calculated by DLS and reported as the mean  $\pm$  standard deviation ( $n=10$ ). N/A (Not applicable).

| Compound                      | Polymer $M_w$ (kDa) | Polymer $\bar{D}$ | $M_w$ (kDa) | $\bar{D}$ | Conjugation Stoichiometry | $R_h$ (nm)    |
|-------------------------------|---------------------|-------------------|-------------|-----------|---------------------------|---------------|
| Exendin                       | N/A                 | N/A               | 4.1         | 1.00      | N/A                       | $2.0 \pm 0.7$ |
| Exendin-PEG <sub>10K</sub>    | 10.2                | 1.06              | 16.2        | 1.10      | 1.01                      | $3.8 \pm 0.2$ |
| Exendin-POEGMA <sub>10K</sub> | 10.3                | 1.06              | 17.3        | 1.07      | 1.01                      | $2.7 \pm 0.8$ |
| OVA                           | N/A                 | N/A               | 42.9        | 1.00      | N/A                       | $2.5 \pm 0.6$ |
| OVA-PEG <sub>10K</sub>        | 10.3                | 1.01              | 54.5        | 1.16      | 1.03                      | $4.5 \pm 0.7$ |
| OVA-POEGMA <sub>10K</sub>     | 10.4                | 1.09              | 54.7        | 1.07      | 1.03                      | $3.3 \pm 0.3$ |

Synthesis and characterization of drug coupled Luminex magnetic beads. The drugs and drug-polymer conjugates —exendin, exendin-PEG<sub>10K</sub>, exendin-POEGMA<sub>10K</sub>, OVA, OVA-PEG<sub>10K</sub>, and OVA-POEGMA<sub>10K</sub>— were covalently coupled to different sets of fluorescently barcoded MagPlex magnetic beads (Luminex) via carbodiimide chemistry by following the manufacturer's instructions with minor modifications.<sup>1</sup> The concentration of drug or drug-polymer conjugate used in the coupling reactions were carefully titrated to ensure that the resulting bead sets had equal amounts of antigen per bead, as described below.

To couple exendin (Santa Cruz Biotechnology), exendin-PEG<sub>10K</sub>, and exendin-POEGMA<sub>10K</sub>, beads were first amine-functionalized as described below. The amine-modified beads were then conjugated to the exendin variants. Briefly, 12.5 million carboxyl-functional beads were rinsed with 0.5 ml of coupling buffer II (0.1 M MES; pH 6.0). Rinsed beads were incubated with 500  $\mu$ L of adipic acid dihydrazide (ADH) (35 mg ml<sup>-1</sup>) and 100  $\mu$ L of EDC (200 mg ml<sup>-1</sup>) for 1 h. The resulting amine-modified beads were washed and resuspended in 200  $\mu$ L of the coupling buffer II. 31.8  $\mu$ L of exendin, 41.7  $\mu$ L of exendin-PEG and 39.7  $\mu$ L of exendin-POEGMA solutions (187.8  $\mu$ M) and 25  $\mu$ L of EDC (200 mg ml<sup>-1</sup>) were added to amine-modified beads followed by bringing the final volume to 250  $\mu$ L and incubation for 2 hours. The resulting drug-coupled beads were blocked overnight in assay buffer, which is 0.2% (w/v) I-Block protein-based

blocking reagent (Thermo Scientific) in PBS (Hyclone). The next morning, they were washed three times, resuspended, and counted using a hemocytometer for final concentration.

For the OVA, OVA-PEG<sub>10K</sub>, and OVA-POEGMA<sub>10K</sub> coupling reaction, 12.5 million beads were rinsed with 250  $\mu$ L deionized water. Rinsed beads were resuspended in 50  $\mu$ L activation buffer (0.1 M NaH<sub>2</sub>PO<sub>4</sub>; pH 6.2), followed by the addition of 25  $\mu$ L of 100 mg ml<sup>-1</sup> N-hydroxy sulfosuccinimide (Sulfo-NHS; Thermo Scientific) and 1-Ethyl-3-[3-dimethylaminopropyl] carbodiimide hydrochloride (EDC; Thermo Scientific) and incubation for 20 min. Activated beads were washed with 1 mL coupling buffer (50 mM 2-(N-morpholino) ethanesulfonic acid (MES); pH 5.0) three times and resuspended in 500  $\mu$ L of the coupling buffer. 93.7  $\mu$ L of OVA, 106.6  $\mu$ L of OVA-PEG<sub>10K</sub>, and 105.6  $\mu$ L of OVA-POEGMA<sub>10K</sub> solutions (46.8  $\mu$ M) were transferred, followed by bringing the total volume to 1 ml with the coupling buffer and incubation for 2 h. The resulting drug-coupled beads were blocked overnight in the assay buffer, washed three times, resuspended, and counted using a hemocytometer. This protocol was also used to couple mouse IgG (Abcam; 2.5  $\mu$ L; 2 mg ml<sup>-1</sup>) and IgM (Bio-Rad; 6.25  $\mu$ L; 2 mg ml<sup>-1</sup>) as positive controls.

The resulting beads were characterized for their level of drug conjugation using anti-drug antibodies at varied concentrations by following the manufacturer's instructions. Briefly, 50  $\mu$ L of each set of beads (50,000 bead ml<sup>-1</sup> in the assay buffer) was transferred to a black, round-bottom 96-well-plate (Corning). Next, serial dilutions were prepared of mouse anti-OVA IgG (Abcam #17293) mouse anti-exendin IgG (Abcam #23407), mouse anti-PEG IgG (Abcam #195350), R-Phycoerythrin-conjugated goat anti-mouse IgG (Jackson ImmunoResearch; 115-115-164), and biotinylated goat anti-mouse IgM (Jackson ImmunoResearch; 115-065-075) in assay buffer. 50  $\mu$ L of the resulting solutions were transferred to wells followed by incubation for 1 h on an orbital shaker. After incubation, a 96-well-plate was placed on a magnetic ring stand (Invitrogen) and incubated for 60 s for capture of the magnetic particles to occur. The supernatant was discarded, and wells were washed with 100  $\mu$ L of the assay buffer. Drug-coupled beads were incubated with 100  $\mu$ L of 5  $\mu$ g ml<sup>-1</sup> R-Phycoerythrin-conjugated goat anti-mouse IgG (Jackson

Immunoresearch; #115-115-164) for 30 minutes. Mouse IgG and IgM-coupled beads were incubated in assay buffer for 30 minutes. After incubation, 96-well-plate was placed on the magnetic ring stand and incubated for 60 seconds for separation to occur. The supernatant was discarded, and wells were washed twice with 100  $\mu$ l of the assay buffer. Mouse IgM coupled beads were incubated with Streptavidin-R-Phycoerythrin Conjugate (SAPE) at 1.5 equivalent concentrations of biotinylated goat anti-mouse IgM used in that particular well for 30 min. The 96-well-plate was placed on the magnetic ring stand and incubated for 60 s for capture of the magnetic particles to occur. The supernatant was discarded, and wells were washed twice with 100  $\mu$ l of the assay buffer. Beads were solubilized in the assay buffer and analyzed using MAGPIX (Luminex).

The resulting bead sets had an equal amount of the same type of antigen. OVA, OVA-PEG<sub>10K</sub>, and OVA-POEGMA<sub>10K</sub> bead sets had equal amounts of OVA, indicated by identical median fluorescence intensity (MFI) detected at varied mouse anti-OVA antibody concentrations (**Supplementary Fig. 32a**). Similarly, exendin, exendin-PEG<sub>10K</sub>, and exendin-POEGMA<sub>10K</sub> bead sets had equal amounts of exendin (**Supplementary Fig. 32b**). Importantly, we confirmed that exendin-PEG<sub>10K</sub>- and OVA-PEG<sub>10K</sub>-conjugated bead sets had equal amounts of PEG (**Supplementary Fig. 32c**). We also confirmed the conjugation of mouse IgG (**Supplementary Fig. 32d**) and mouse IgM (**Supplementary Fig. 32e**) on the positive control beads.

Optimization and validation of the LMI. The LMI was optimized in its background, specificity, sensitivity, precision, and linearity. The optimized assay was validated by performing a spike-and-recovery experiment.

Background. The Limit of Blank (LoB) was defined as median fluorescence intensity (MFI) of singleplex and multiplexed drug-coupled magnetic beads in assay buffer. Singlet LoB (SLoB) and multiplexed LoB (MLoB) were calculated by adding three standard deviations to the mean MFI in the assay buffer (**Supplementary Table 3**). The highest SLoB was 42 MFI, roughly corresponding to 0.26% of MFI detected with anti-drug

antibodies, indicating that drug-coupled beads have a low fluorescence background. Importantly, SLoB and MLoB were not significantly different ( $P>0.99$ ), indicating that multiplexing the beads does not affect their fluorescence background.

*Specificity.* We tested if the control antibodies (anti-exendin IgG, anti-OVA IgG, anti-PEG IgG, anti-mouse IgG, and anti-mouse IgM) showed any cross-reactivity to the drug-coupled beads by incubating singleplex and multiplexed beads with a single type or multiple types of antibodies. Cross-reactivity of a bead set to a control antibody was calculated as the percent MFI signal of a true positive bead set and was less than 1% for all drug-coupled beads at  $1\text{ }\mu\text{g ml}^{-1}$  antibody concentration. This result indicated that the control reagents were of high specificity. Similarly, the assay buffer showed no cross-reactivity to anti-drug antibodies or drugs (**Supplementary Table 4**).



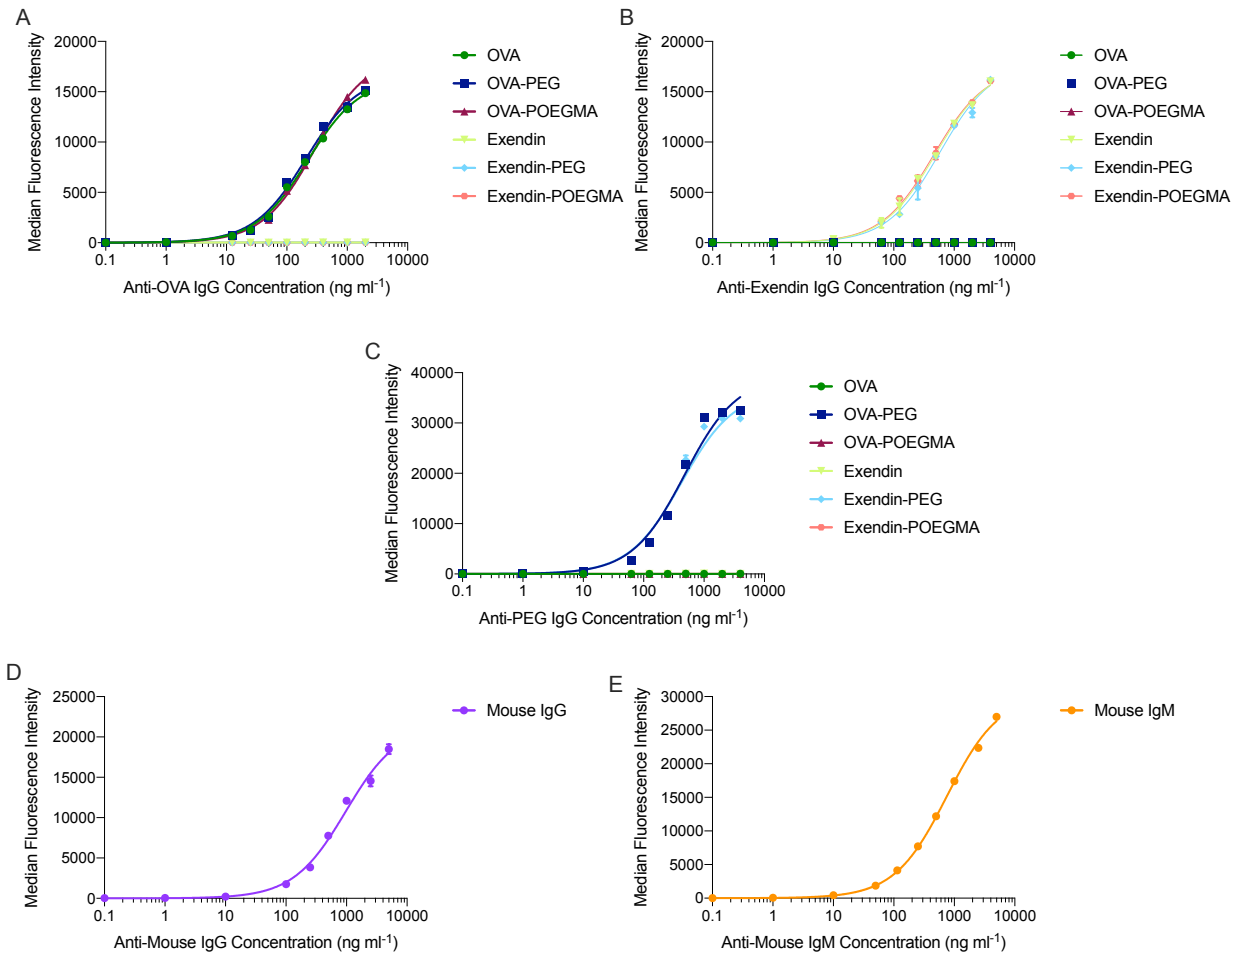

**Supplementary Figure 32. Characterization of drug- and antibody-coupled beads used in Luminex multiplexed immunoassays.** The amount of drug coupled was carefully titrated to ensure that the resulting bead sets had equal amounts of the same type of antigen, indicated by near-identical MFI detected at varied positive control antibody concentrations.

**Supplementary Table 3. Background of the LMI.** The Limit of Blank (LoB) was defined as MFI of singlet and multiplexed drug-coupled magnetic beads in assay buffer. SLoB and MLoB were calculated by adding three standard deviations to the mean MFI detected in the assay buffer. Data were analyzed using two-way repeated-measures ANOVA, followed by Tukey's multiple comparison test.  $P < 0.05$  was considered statistically significant. N/A (Not applicable).

| Antigen/<br>Limit of Blank (LoB) | OVA  | OVA-PEG <sub>10K</sub> | OVA-POEGMA <sub>10K</sub> | Exendin | Exendin-PEG <sub>10K</sub> | Exendin-POEGMA <sub>10K</sub> | Mouse IgG | Mouse IgM |
|----------------------------------|------|------------------------|---------------------------|---------|----------------------------|-------------------------------|-----------|-----------|
| Singlex LoB                      | 41.2 | 40.3                   | 40.6                      | 36.9    | 39.1                       | 28.6                          | 26.8      | 29.5      |
| Multiplexed LoB                  | 26.2 | 27.1                   | 38.8                      | 26.1    | 34.6                       | 35.5                          | N/A       | N/A       |

**Supplementary Table 4. The specificity of the control antibodies used in the LMI.** Cross-reactivity of a bead set to a control antibody was calculated as the percent MFI signal of a true positive bead set and assessed at  $1 \mu\text{g ml}^{-1}$  control antibody concentration. Data represent the mean and SEM.

| Singleplex Antigen Cross-Reactivity (%)        |          |           |            |           |             |                |           |           |
|------------------------------------------------|----------|-----------|------------|-----------|-------------|----------------|-----------|-----------|
| Antigen/Anti-Drug Antibody                     | OVA      | OVA-PEG   | OVA-POEGMA | Exendin   | Exendin-PEG | Exendin-POEGMA | Mouse IgG | Mouse IgM |
| Anti-OVA IgG                                   | 100±7.0  | 100±0.4   | 100±2.2    | 0.2±0.01  | 0.2±0.01    | 0.2±0.01       | 0.6±0.04  | 0.2±0.03  |
| Anti-PEG IgG                                   | 0.5±0.1  | 234.5±0.5 | 0.6±0.1    | 0.2±0.01  | 280.4±4.2   | 0.6±0.06       | 0.5±0.04  | 0.2±0.02  |
| Anti-Exendin IgG                               | 0.2±0.02 | 0.3±0.1   | 0.2±0.04   | 100±1.4   | 100±2.25    | 100±5.47       | 0.5±0.02  | 0.2±0.06  |
| Anti-Mouse IgG                                 | 0.2±0.01 | 0.2±0.02  | 0.1±0.01   | 0.2±0.02  | 0.2±0.02    | 0.2±0.01       | 100±6     | 0.2±0.02  |
| Anti-Mouse IgM                                 | 0.2±0.01 | 0.2±0.02  | 0.2±0.02   | 0.2±0.02  | 0.2±0.02    | 0.1±0.02       | 0.7±0.07  | 100±9.3   |
| Anti-OVA IgG + Anti-Exendin IgG                | 98.1±0.1 | 94.5±4.4  | 96.4±1.1   | 101.8±9.2 | 100.7±1     | 97.9±0.9       | 0.5±0.1   | 0.3±0.06  |
| Anti-OVA IgG + Anti-Exendin IgG + Anti-PEG IgG | 98.4±6.1 | 314.3±7.7 | 96.0±9.4   | 102.2±2.5 | 377.2±0.3   | 103.5±4.1      | 0.6±0.07  | 0.2±0.2   |
| Multiplexed Antigen Cross-Reactivity (%)       |          |           |            |           |             |                |           |           |
| Antigen/Anti-Drug Antibody                     | OVA      | OVA-PEG   | OVA-POEGMA | Exendin   | Exendin-PEG | Exendin-POEGMA | Mouse IgG | Mouse IgM |
| Anti-OVA IgG                                   | 100±3    | 100±4.6   | 100±1.4    | 0.2±0.02  | 0.2±0.05    | 0.2±0.03       | 0.5±0.1   | 0.1±0.01  |
| Anti-PEG IgG                                   | 0.2±0.03 | 231±2.8   | 0.24±0.1   | 0.65±0.02 | 233.8±2.7   | 0.35±0.03      | 0.5±0.02  | 0.1±0.02  |
| Anti-Exendin IgG                               | 0.2±0.03 | 0.2±0.01  | 0.2±0.05   | 100±1.2   | 100±1.2     | 100±2.4        | 0.5±0.01  | 0.2±0.01  |
| Anti-Mouse IgG                                 | 0.1±0.1  | 0.07±0.08 | 0.2±0.01   | 0.1±0.07  | 0.2±0.01    | 0.1±0.09       | 100±2.2   | 0.9±0.05  |
| Anti-Mouse IgM                                 | 0.1±0.04 | 0.2±0.01  | 0.2±0.02   | 0.2±0.1   | 0.2±0.01    | 0.2±0.03       | 0.5±0.03  | 100±0.7   |
| Anti-OVA IgG + Anti-Exendin IgG                | 96.3±2   | 241±1.6   | 97.3±3.2   | 93.8±2.6  | 239±4.3     | 94.5±4.2       | 0.2±0.01  | 0.1±0.1   |
| Anti-OVA IgG + Anti-Exendin IgG + Anti-PEG IgG | 94.3±1.9 | 327.3±7.2 | 100.8±1.9  | 100.9±0.6 | 346.3±4.6   | 97.9±4.8       | 0.6±0.3   | 0.2±0.08  |

**Sensitivity.** The sensitivity of the immunoassay was assessed at varying concentrations of the control antibodies. The Limit of Detection (LoD) was defined as the minimum detectable control antibody dose for a particular drug-coupled bead and calculated for each bead set as mean antibody concentration plus three standard deviations. LoD was below  $1.5 \text{ ng ml}^{-1}$  for all antigens (**Supplementary Table 5**), indicating that the assay has high sensitivity. The lower limit of quantification (LLOQ) and upper limit of quantification (ULOQ) were defined as the minimum and maximum antibody concentration detected in the assay's

linear working range plus three standard deviations, *respectively, and* demarcate the lower and upper boundaries of the assay for each bead set.

**Supplementary Table 5. The sensitivity of the LMI.** The LoD was defined as the minimum detectable control antibody dose for a particular drug-coupled bead and calculated for each bead set as mean antibody concentration plus three standard deviations. The LLoQ and ULoQ defined the lower and upper boundaries of the assay's linear working range for each bead set. N/A (Not applicable).

| Antigen/<br>Sensitivity (ng ml <sup>-1</sup> ) | OVA   | OVA-PEG <sub>10K</sub> | OVA-POEGMA <sub>10K</sub> | Exendin | Exendin-PEG <sub>10K</sub> | Exendin-<br>POEGMA <sub>10K</sub> | Mouse IgG | Mouse IgM |
|------------------------------------------------|-------|------------------------|---------------------------|---------|----------------------------|-----------------------------------|-----------|-----------|
| Anti-OVA LoD                                   | 0.315 | 0.289                  | 0.426                     | N/A     | N/A                        | N/A                               | N/A       | N/A       |
| Anti-OVA LLoQ                                  | 0.999 | 1.063                  | 0.935                     | N/A     | N/A                        | N/A                               | N/A       | N/A       |
| Anti-OVA ULoQ                                  | 119.8 | 123.1                  | 115.0                     | N/A     | N/A                        | N/A                               | N/A       | N/A       |
| Anti-PEG LoD                                   | N/A   | 0.514                  | N/A                       | N/A     | 0.450                      | N/A                               | N/A       | N/A       |
| Anti-PEG LLoQ                                  | N/A   | 1.001                  | N/A                       | N/A     | 1.002                      | N/A                               | N/A       | N/A       |
| Anti-PEG ULoQ                                  | N/A   | 568.3                  | N/A                       | N/A     | 507.5                      | N/A                               | N/A       | N/A       |
| Anti-Exendin LoD                               | N/A   | N/A                    | N/A                       | 1.248   | 1.452                      | 1.397                             | N/A       | N/A       |
| Anti-Exendin LLoQ                              | N/A   | N/A                    | N/A                       | 5.276   | 5.185                      | 5.191                             | N/A       | N/A       |
| Anti-Exendin ULoQ                              | N/A   | N/A                    | N/A                       | 103.3   | 124.4                      | 129.4                             | N/A       | N/A       |
| Anti-mouse IgG LoD                             | N/A   | N/A                    | N/A                       | N/A     | N/A                        | N/A                               | 0.126     | N/A       |
| Anti-mouse IgG LLoQ                            | N/A   | N/A                    | N/A                       | N/A     | N/A                        | N/A                               | 1.171     | N/A       |
| Anti-mouse IgG ULoQ                            | N/A   | N/A                    | N/A                       | N/A     | N/A                        | N/A                               | 500.1     | N/A       |
| Anti-mouse IgM LoD                             | N/A   | N/A                    | N/A                       | N/A     | N/A                        | N/A                               | N/A       | 0.326     |
| Anti-mouse IgM LLoQ                            | N/A   | N/A                    | N/A                       | N/A     | N/A                        | N/A                               | N/A       | 0.997     |
| Anti-mouse IgM ULoQ                            | N/A   | N/A                    | N/A                       | N/A     | N/A                        | N/A                               | N/A       | 169.6     |

**Linearity.** The assay's linearity was determined by assessing whether assay values were proportional to the analyte concentration. It was defined as the goodness of fit ( $R^2$ ) of at least four dilutions of plasma or control antibodies in the assay buffer.  $R^2$  values were greater than 0.98 for all bead sets, indicating that working conditions remained in the assay's dynamic range (**Supplementary Table 6**).

**Supplementary Table 6. The linearity of the LMI.** Linearity was defined as the  $R^2$  of at least four dilutions of plasma or control antibodies in the assay buffer. Not applicable (N/A).

| Linearity Correlation Coefficient in Assay Buffer          |       |                        |                           |         |                            |                               |           |           |
|------------------------------------------------------------|-------|------------------------|---------------------------|---------|----------------------------|-------------------------------|-----------|-----------|
| Antigen/Anti-Drug Antibody                                 | OVA   | OVA-PEG <sub>10K</sub> | OVA-POEGMA <sub>10K</sub> | Exendin | Exendin-PEG <sub>10K</sub> | Exendin-POEGMA <sub>10K</sub> | Mouse IgG | Mouse IgM |
| Anti-OVA IgG                                               | 0.999 | 0.999                  | 0.993                     | N/A     | N/A                        | N/A                           | N/A       | N/A       |
| Anti-PEG IgG                                               | N/A   | 0.999                  | N/A                       | N/A     | 0.985                      | N/A                           | N/A       | N/A       |
| Anti-Exendin IgG                                           | N/A   | N/A                    | N/A                       | 0.999   | 0.998                      | 0.999                         | N/A       | N/A       |
| Anti-Mouse IgG                                             | N/A   | N/A                    | N/A                       | N/A     | N/A                        | N/A                           | 0.999     | N/A       |
| Anti-Mouse IgM                                             | N/A   | N/A                    | N/A                       | N/A     | N/A                        | N/A                           | N/A       | 0.984     |
| Linearity Correlation Coefficient in Immunized Mice Plasma |       |                        |                           |         |                            |                               |           |           |
| Antigen/ Plasma                                            | OVA   | OVA-PEG <sub>10K</sub> | OVA-POEGMA <sub>10K</sub> | Exendin | Exendin-PEG <sub>10K</sub> | Exendin-POEGMA <sub>10K</sub> | Mouse IgG | Mouse IgM |
| Anti-OVA                                                   | 0.994 | 0.987                  | 0.993                     | N/A     | N/A                        | N/A                           | N/A       | N/A       |
| Anti-OVA-PEG                                               | 0.990 | 0.976                  | 0.995                     | N/A     | N/A                        | N/A                           | N/A       | N/A       |
| Anti-OVA-POEGMA                                            | 0.993 | 0.985                  | 0.994                     | N/A     | N/A                        | N/A                           | N/A       | N/A       |
| Anti-Exendin                                               | N/A   | N/A                    | N/A                       | N/S     | N/S                        | N/S                           | N/A       | N/A       |
| Anti-Exendin-PEG                                           | N/A   | N/A                    | N/A                       | N/S     | 0.990                      | N/S                           | N/A       | N/A       |
| Anti-Exendin-POEGMA                                        | N/A   | N/A                    | N/A                       | N/S     | N/S                        | N/S                           | N/A       | N/A       |

**Precision.** Precision was determined by assessing the repeatability and the reproducibility of the assay and is defined as the intra-assay and inter-assay variability. Intra-assay variability (%CV) was calculated by dividing the standard deviation of anti-drug IgG concentration measured using drug-coupled beads ( $n=9$ ) on the same plate by its mean. Inter-assay variability (%CV) was calculated by dividing the standard deviation of anti-drug IgG concentration measured using drug-coupled beads on three different plates ( $n=3$ ) by its mean. Intra-assay and inter-assay variabilities were 6.57% and 9.57% for all antigens, indicating that the assay had high precision (**Supplementary Table 7**).

**Supplementary Table 7. The precision of the LMI.** Precision was determined by assessing the repeatability and the reproducibility of the assay and defined as intra-assay and inter-assay variability.

| Spiked Control Reagent                         | Intra-Assay Variability (%CV) | Inter-Assay Variability (%CV) |
|------------------------------------------------|-------------------------------|-------------------------------|
| Anti-OVA IgG + Anti-Exendin IgG + Anti-PEG IgG | <6.57                         | <9.57                         |

**Validation.** The optimized multiplexed immunoassay was validated by performing a spike-and-recovery experiment. Briefly, PBS-treated mouse plasma was spiked with 25 ng ml<sup>-1</sup> of exendin, OVA, and PEG antibodies the percent drug recovered from the assay at varying dilutions was calculated. The % recovery

was 105.4 ± 9.6 in the assay buffer and 102 ± 7.7 in the plasma, validating the assay performance (Supplementary Table 8).

**Supplementary Table 8. The validation of the optimized LMI.** The optimized multiplexed immunoassay was validated by performing a spike-and-recovery experiment. Data represent the mean and standard deviation.

| Spiked Control Reagent                         | Recovery in Diluent (%) | Recovery in Plasma (%) |
|------------------------------------------------|-------------------------|------------------------|
| Anti-OVA IgG + Anti-Exendin IgG + Anti-PEG IgG | 105.4±9.6               | 102±7.7                |

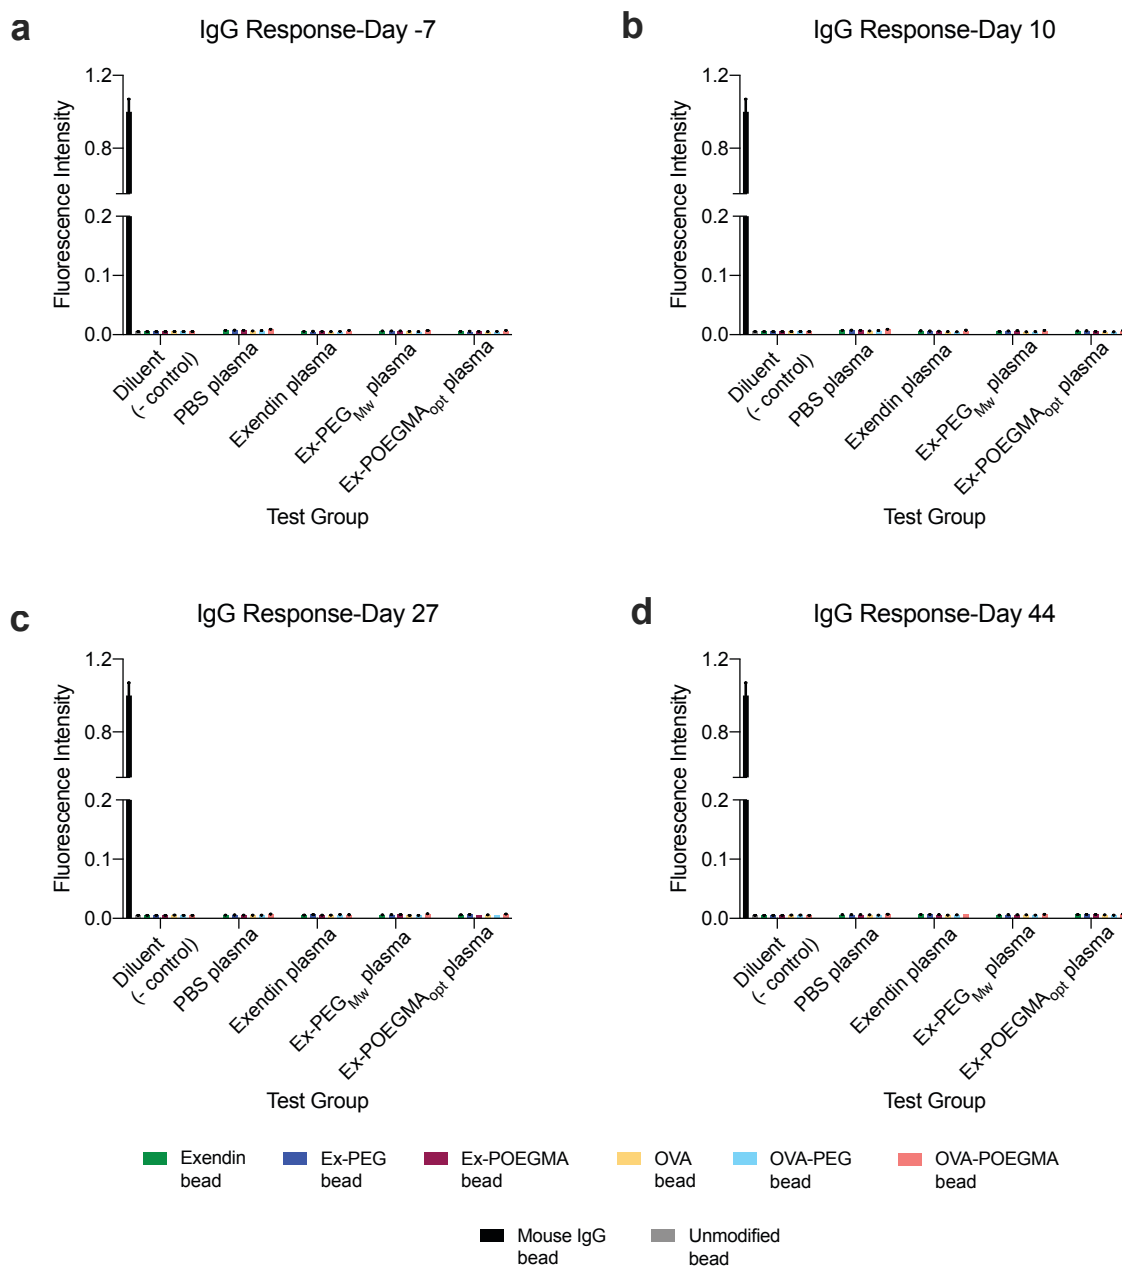

**Supplementary Figure 33. Ex-POEGMA<sub>opt</sub> does not induce exendin- or POEGMA-specific IgGs.** IgG response on (A) Day -7, (B) Day 10, (C) Day 27, and (D) Day 44. Blood samples were collected from mice repeatedly treated with PBS, exendin, Ex-PEG<sub>MW</sub>, and Ex-POEGMA<sub>opt</sub>. ADA response was analyzed using a LMI. Ex-PEG- and Ex-POEGMA-coupled beads were used to determine ADAs induced towards the entire conjugate (*i.e.*, anti-exendin and anti-polymer (PEG or POEGMA)). OVA-PEG- and OVA-POEGMA-coupled beads were used to determine ADAs induced towards PEG or POEGMA, respectively. The OVA-coupled bead was used as a negative control for cross-reactivity towards OVA. Data represent the mean ADA response induced in each mouse and the

SEM. Data were analyzed by two-way repeated-measures ANOVA, followed by *post-hoc* Tukey's multiple comparison test. Data were considered statistically significant when  $p < 0.05$ .

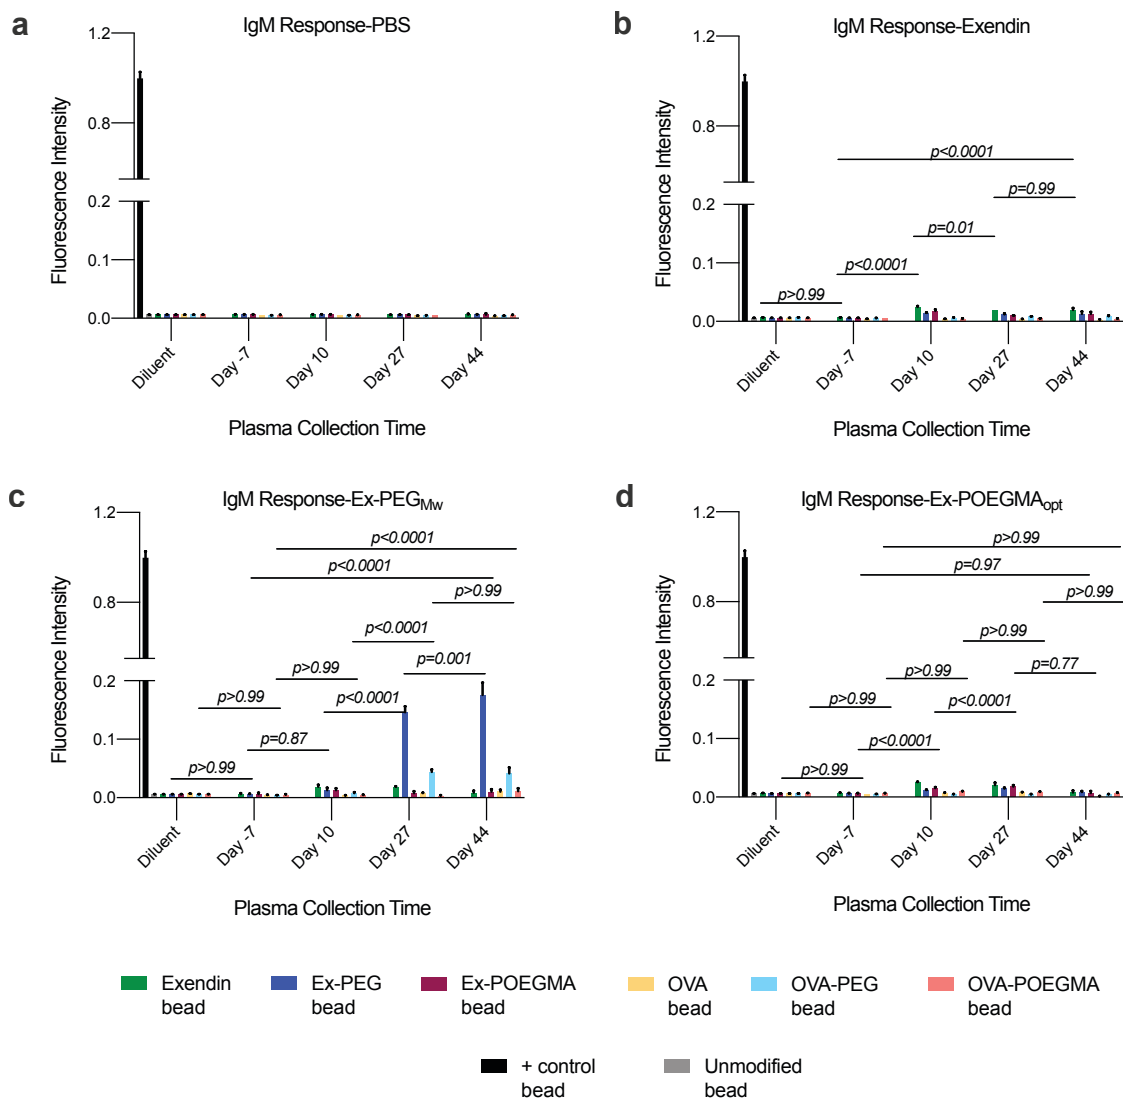

**Supplementary Figure 34. Development of IgM responses towards exendin variants over time.** IgM response towards (A) PBS, (B) exendin, (C) Ex-PEG<sub>Mw</sub>, and (D) Ex-POEGMA<sub>opt</sub>. Blood samples were collected from mice repeatedly treated with PBS, exendin, Ex-PEG<sub>Mw</sub>, and Ex-POEGMA<sub>opt</sub>. ADA response analyzed using a LMI. Ex-PEG- and Ex-POEGMA-coupled beads were used to determine ADAs induced towards the entire conjugate (*i.e.*, anti-exendin and anti-polymer (PEG or POEGMA)). OVA-PEG- and OVA-POEGMA-coupled beads were used to determine ADAs induced towards PEG or POEGMA, respectively. The OVA-coupled bead was used as a negative control for cross-reactivity towards OVA. Different panels represent mice immunized with the various materials, while the different colored bars are what was applied in the multiplex assay. Data represent the mean ADA response

induced in each mouse and the SEM. Data were analyzed by two-way repeated-measures ANOVA, followed by *post-hoc* Tukey's multiple comparison test. Data were considered statistically significant when  $p < 0.05$ .

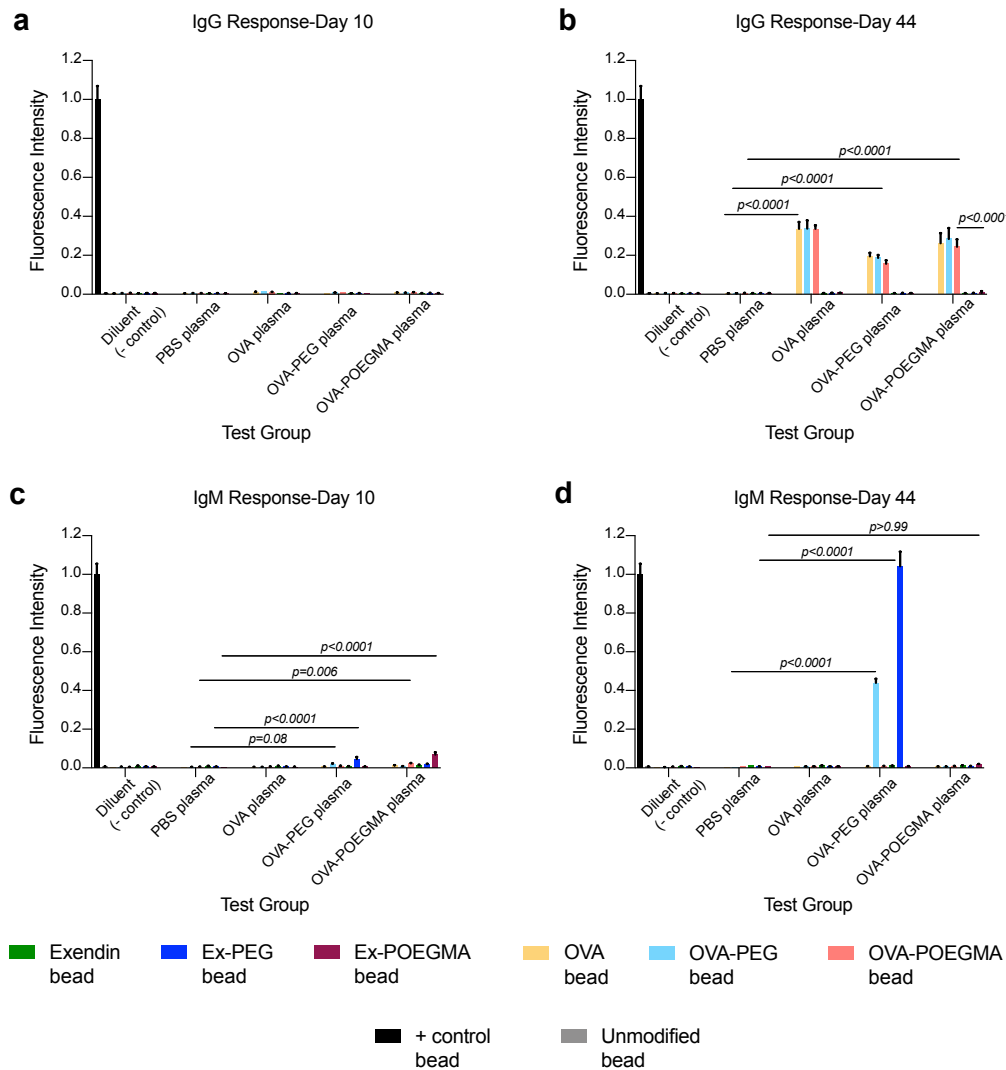

**Supplementary Figure 35. OVA-POEGMA does not induce anti-POEGMA antibodies except a mild and transient IgM response.**

IgM response on (A) Day 10, (B) Day 27, and (C) Day 44. IgG response on (D) Day 10, (E) Day 27, and (F) Day 44. Blood samples were collected from C57BL/6J mice treated with OVA, OVA-PEG, and OVA-POEGMA ( $2.34 \mu\text{M}$ ) at an equivalent dose of  $9.6 \text{ nmol kg}^{-1}$  bodyweight using an equivalent volume of PBS as a negative control. Blood collection and drug injection followed the timeline given in Figure 6a. ADA response analyzed using a LMI. OVA-PEG- and OVA-POEGMA-coupled beads were used to determine ADAs induced towards the entire conjugate (*i.e.*, anti-OVA and anti-polymer (PEG or POEGMA)). Ex-PEG- and Ex-POEGMA-coupled



428 beads were used to determine ADAs induced towards PEG or POEGMA, respectively. The exendin-coupled bead was used as a  
429 negative control for cross-reactivity towards OVA. Data represent the mean ADA response induced in each mouse and the SEM.  
430 Data were analyzed by two-way repeated-measures ANOVA, followed by *post-hoc* Tukey's multiple comparison test. Data were  
431 considered statistically significant when  $p < 0.05$ .

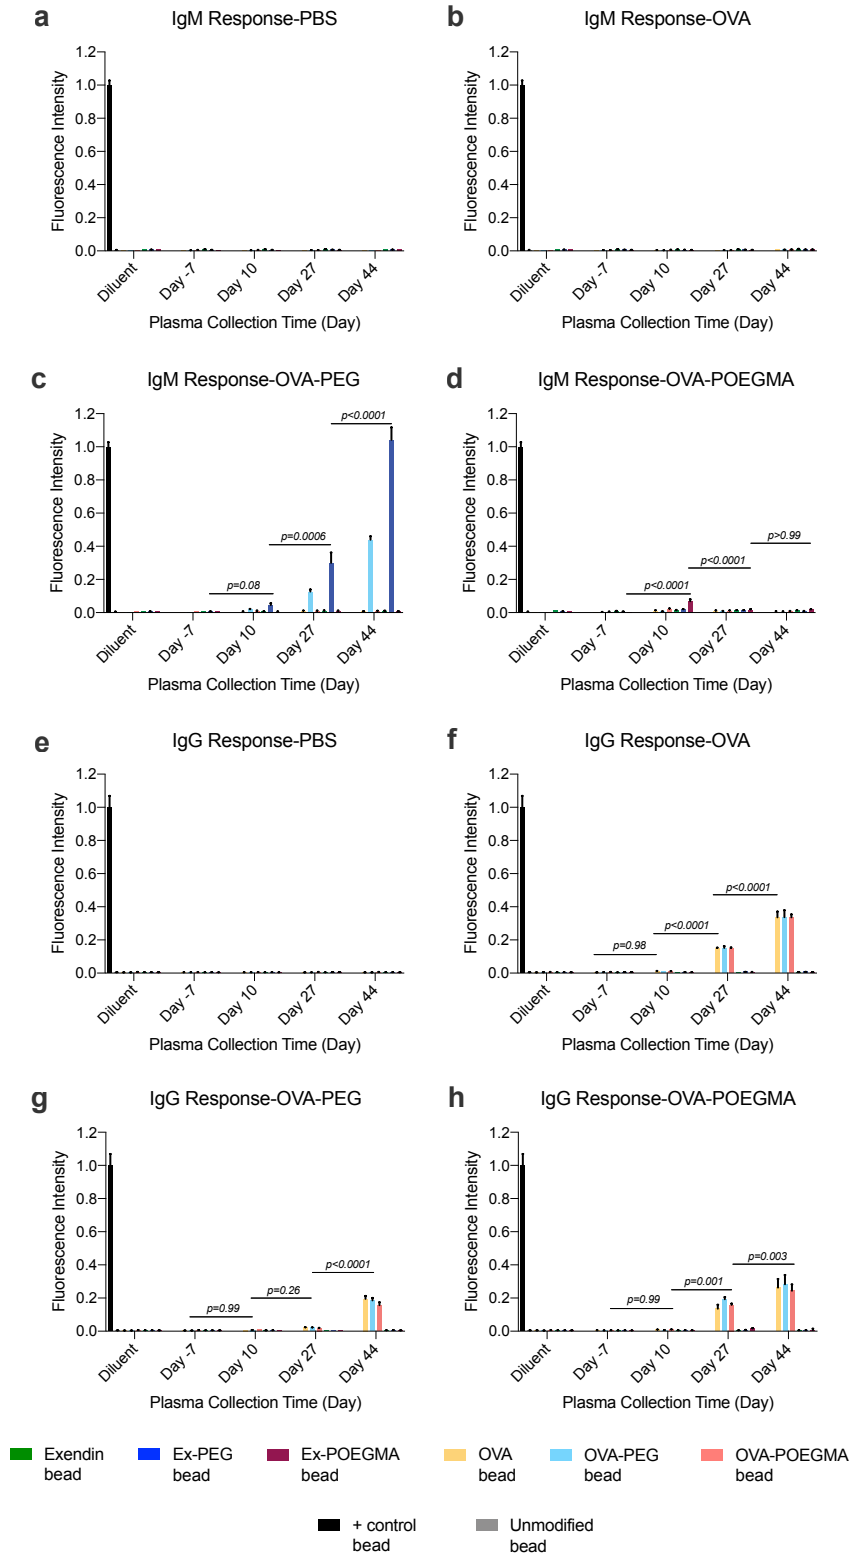

**Supplementary Figure 36. Development of immune response towards OVA-based treatments over time.** IgM response towards (A) PBS, (B) OVA, (C) OVA-PEG, and (D) OVA-POEGMA. IgG response towards (E) PBS, (F) OVA, (G) OVA-PEG, and (H) OVA-

435 POEGMA. Blood samples were collected from C57BL/6J mice treated with OVA, OVA-PEG, and OVA-POEGMA at an equivalent  
436 dose of 9.6 nmol kg<sup>-1</sup> bodyweight using an equivalent volume of PBS as a negative control. Blood collection and drug injection  
437 followed the timeline given in Figure 6a. ADA response analyzed using a LMI platform. OVA-PEG- and OVA-POEGMA-coupled  
438 beads were used to determine ADAs induced towards the entire conjugate (*i.e.*, anti-OVA and anti-polymer (PEG or POEGMA)).  
439 Ex-PEG- and Ex-POEGMA-coupled beads were used to determine ADAs induced towards PEG or POEGMA, respectively. The  
440 exendin-coupled bead was used as a negative control for cross-reactivity towards OVA. Data represent the mean ADA response  
441 induced in each mouse and the SEM. Data were analyzed by two-way repeated-measures ANOVA, followed by *post-hoc* Tukey's  
442 multiple comparison test. Data were considered statistically significant when  $p < 0.05$ .

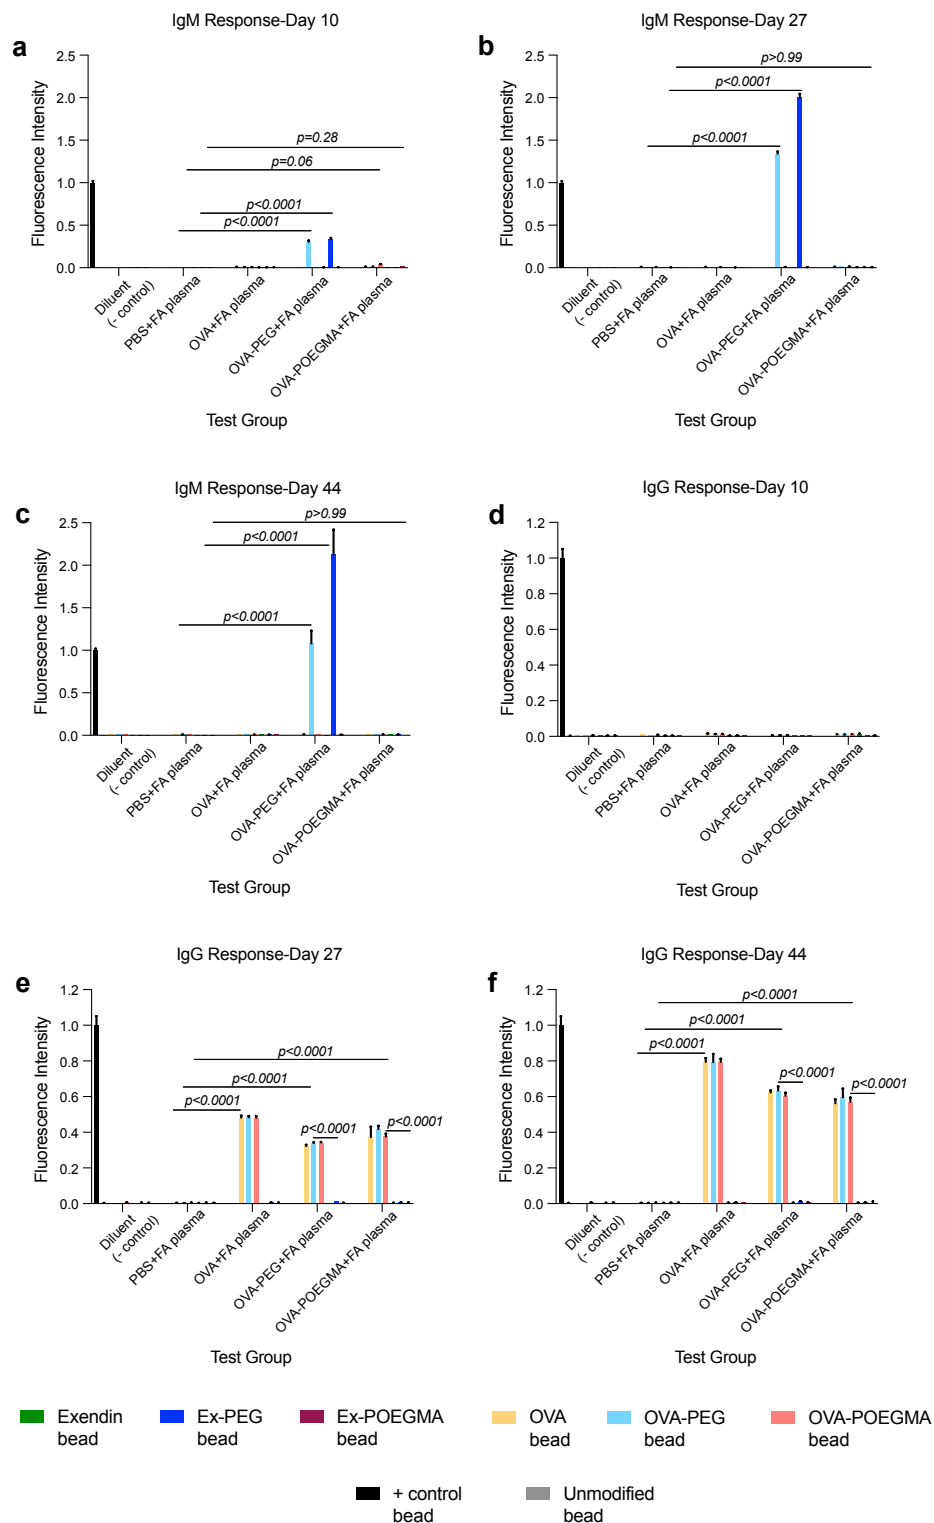

443

444

Supplementary Figure 37. OVA-POEGMA administrated with FA does not induce anti-POEGMA antibodies except a mild and

445

transient IgM response. IgM response on (A) Day 10, (B) Day 27, and (C) Day 44. IgG response on (D) Day 10, (E) Day 27, and (F)

446 Day 44. Blood samples were collected from C57BL/6J mice treated with equivalent doses of 1:1 (v/v) emulsions of OVA, OVA-  
447 PEG, and OVA-POEGMA in PBS and FA using an equivalent volume of PBS as a negative control. Blood collection and drug injection  
448 followed the timeline given in Figure 6a. ADA response analyzed using a Luminex multiplexed immunoassay platform. OVA-PEG-  
449 and OVA-POEGMA-coupled beads were used to determine ADAs induced towards the entire conjugate (*i.e.*, anti-OVA and anti-  
450 polymer (PEG or POEGMA)). Ex-PEG- and Ex-POEGMA-coupled beads were used to determine ADAs induced towards PEG or  
451 POEGMA, respectively. The exendin-coupled bead was used as a negative control for cross-reactivity towards OVA. Data  
452 represent the mean ADA response induced in each mouse and the SEM. Data were analyzed by two-way repeated-measures  
453 ANOVA, followed by *post-hoc* Tukey's multiple comparison test. Data were considered statistically significant when  $p < 0.05$ .

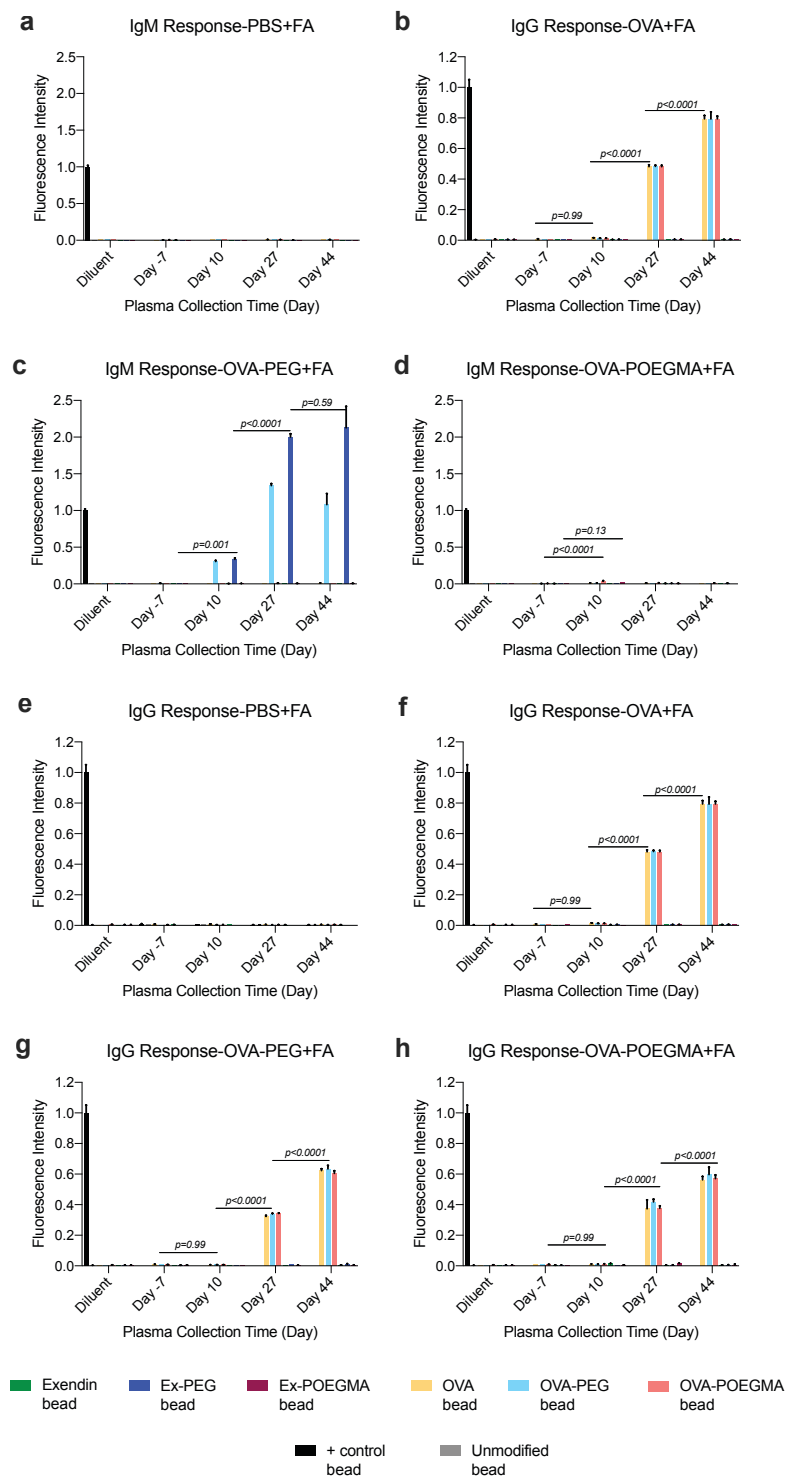

454

455 **Supplementary Figure 38. Development of immune response towards OVA variants administered as FA emulsions over time.**

456 IgM response towards (A) PBS, (B) OVA, (C) OVA-PEG, and (D) OVA-POEGMA. IgG response towards (E) PBS, (F) OVA, (G) OVA-

457 PEG, and (H) OVA-POEGMA. Blood samples were collected from C57BL/6J mice treated with equivalent doses of 1:1 (v/v)

emulsions of OVA, OVA-PEG, and OVA-POEGMA in PBS and FA using an equivalent volume of PBS as a negative control. Blood collection and drug injection followed the timeline given in Figure 6a. ADA response analyzed using a LMI. OVA-PEG- and OVA-POEGMA-coupled beads were used to determine ADAs induced towards the entire conjugate (*i.e.*, anti-OVA and anti-polymer (PEG or POEGMA)). Ex-PEG- and Ex-POEGMA-coupled beads were used to determine ADAs induced towards PEG or POEGMA, respectively. The exendin-coupled bead was used as a negative control for cross-reactivity towards OVA. Data represent the mean ADA response induced in each mouse and the SEM. Data were analyzed by two-way repeated-measures ANOVA, followed by *post-hoc* Tukey's multiple comparison test. Data were considered statistically significant when  $p < 0.05$ .

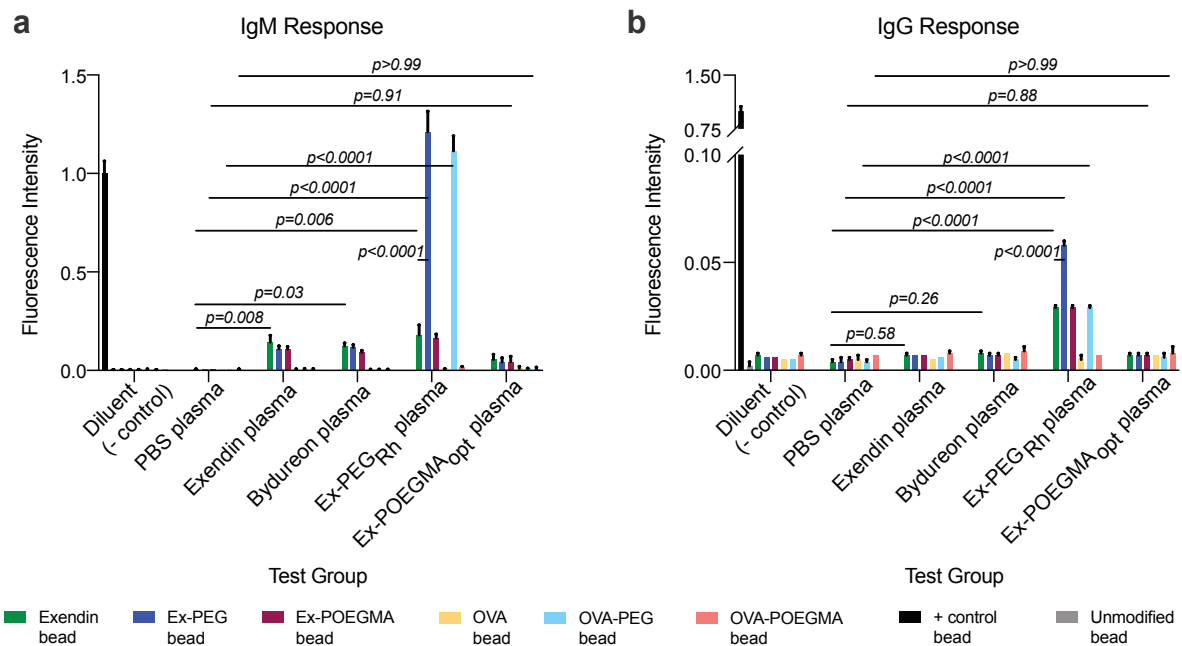

**Supplementary Figure 39. Ex-POEGMA<sub>opt</sub> does not induce anti-POEGMA antibodies after long-term treatment. (A) IgM and (B) IgG response after weekly treatment of 6-week-old *db/db* mice ( $n=5$ ) for eight weeks with equivalent drug dose of exendin, Bydureon, Ex-PEG<sub>Rh</sub>, and Ex-POEGMA<sub>opt</sub>, and an equivalent volume of PBS as a negative control. Blood samples were collected ten days after the last drug injection. ADA response was measured by a LMI. Ex-PEG- and Ex-POEGMA-coupled beads were used to determine ADAs induced towards the entire conjugate (*i.e.*, anti-exendin and anti-polymer (PEG or POEGMA)). OVA-PEG- and OVA-POEGMA-coupled beads were used to determine ADAs induced towards PEG or POEGMA, respectively. The OVA-coupled bead was used as a negative control for cross-reactivity towards OVA. Data represent the mean of the ADA response induced in each mouse and the error bars are the SEM. Data were analyzed by two-way repeated-measures ANOVA, followed by *post-hoc* Tukey's multiple comparison test. Data were considered statistically significant when  $p<0.05$ .**



Design, optimization, and validation of a cell-based neutralizing antibody assay.

Assay Design. The presence of neutralizing antibodies (NAb) was tested in long-term treated mice sera. Nabs were analyzed using the in vitro cell-based assay described in Methods with minor modifications.<sup>2</sup> Briefly, the mice serum samples were incubated with exendin, Ex-PEG<sub>Mw</sub>, or Ex-POEGMA<sub>opt</sub> for 2 h at room temperature. HEK293/CRE-Luc/GLP1R cells were then treated with the serum: drug mixtures (10% v/v) for 5 h at a final concentration of the drugs' respective half-maximal effective concentration (EC<sub>50</sub>), followed by measurement of luminescence from the cells. This assay allowed us to determine the binding antibodies' neutralizing ability, such that if there were NAb present, they interacted with the drugs and blocked their binding to GLP1R, preventing cAMP induction and leading to a decrease in luminescence.

Assay optimization. The NAb assay was optimized in terms of matrix interference and sensitivity.

Matrix interference. The matrix interference was tested in terms of HEK293/CRE-Luc/GLP1R cells' ability to respond to a fixed concentration of exendin at varying dilutions of PBS-treated C57BL/6J mice sera. We found that mice sera  $\leq 5\%$  (volume) did not significantly affect cell behavior (data not shown). Therefore, the final serum volume was kept constant at 5% across all assays.

Sensitivity. The sensitivity of the cell-based neutralizing antibody assay was tested using anti-exendin (NBP1-05179H; Novus Biologicals) and anti-PEG (ab195350; Abcam) antibodies as positive controls and anti-OVA antibody (ab17293; Abcam) as a negative control. Briefly, exendin, Ex-PEG<sub>Mw</sub>, or Ex-POEGMA<sub>opt</sub> were preincubated with varied concentrations of anti-exendin, anti-PEG, and anti-OVA antibodies, which were diluted in 5% PBS-treated C57BL/6J mice sera, followed by treating HEK293/CRE-Luc/GLP1R cells and measuring luminescence. The luminescence signal measured from cells in each treatment group was represented as the percentage of the mean signal of cells treated without antibodies (**Supplementary Fig. 40**). Anti-exendin antibodies inhibited exendin (**Supplementary Fig. 40a**), Ex-PEG<sub>Mw</sub> (**Supplementary Fig. 40b**), or Ex-POEGMA<sub>opt</sub> (**Supplementary Fig. 40c**), while anti-OVA antibodies did not have any effect on the

499 drugs' activity. Anti-PEG antibodies only inhibited Ex-PEG<sub>Mw</sub> (**Supplementary Fig. 40b**) and did not affect  
500 the activity of exendin (**Supplementary Fig. 40a**) and Ex-POEGMA<sub>opt</sub> (**Supplementary Fig. 40c**). The assay  
501 sensitivity was defined as the half-maximal inhibitory concentration (IC<sub>50</sub>) of the antibodies and was  
502 summarized in **Supplementary Table 9**. The assay was more sensitive for exendin ( $7.2 \pm 1.1$  nM) than Ex-  
503 PEG<sub>Mw</sub> ( $26.9 \pm 5.3$  nM) and Ex-POEGMA<sub>opt</sub> ( $23.5 \pm 3.1$  nM) due to the lower concentration of exendin (0.15  
504 nM) used in the assay than Ex-PEG<sub>Mw</sub> (2.7 nM) and Ex-POEGMA<sub>opt</sub> (2.8 nM). The molar equivalent of anti-  
505 exendin antibody needed to inhibit Ex-PEG<sub>Mw</sub> ( $10.0 \pm 2.0$ ) and Ex-POEGMA<sub>opt</sub> ( $8.4 \pm 1.1$ ) half-maximally  
506 was higher than exendin ( $48 \pm 7.3$ ) due to the steric hindrance imparted on exendin by conjugated PEG  
507 and POEGMA. The assay sensitivity for anti-PEG antibodies was  $28.3 \pm 3.5$  nM, which corresponded to the  
508  $10.5 \pm 1.3$  molar equivalent of Ex-PEG<sub>Mw</sub>.

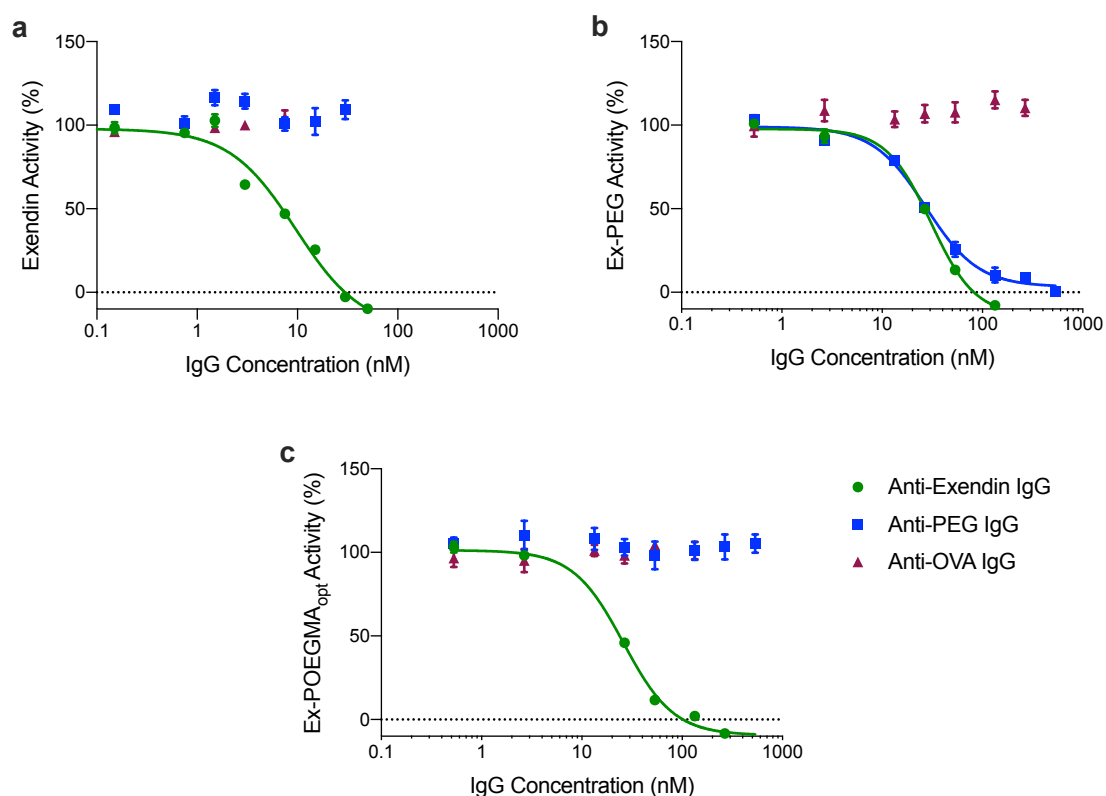

**Supplementary Figure 40. The sensitivity of a NAb assay.** Exendin, Ex-PEG<sub>MW</sub>, and Ex-POEGMA<sub>opt</sub> were preincubated with varied concentrations of anti-exendin, anti-PEG, and anti-OVA antibodies in PBS-treated C57BL/6J mice sera, followed by treating HEK293/CRE-Luc/GLP1R cells with the serum: drug mixtures (10% v/v) for 5 hours at a final concentration of the drugs' respective EC<sub>50</sub>s and measuring luminescence. The luminescence signal derived from each treatment group was represented as the percentage of the mean signal of cells treated without antibodies. Data were fitted to a non-linear curve fit using GraphPad Prism 8 software.

**Supplementary Table 9. Summary of results of a cell-based neutralizing antibody assay.** Assay sensitivity was calculated from the data shown in Supplementary Figure 41. Data represent the mean and the SEM. Data were fitted to a non-linear curve fit to calculate the half-maximal inhibitory concentration (IC<sub>50</sub>) of the antibodies using GraphPad Prism 8 software. Not applicable (n/a).

| Treatment                | Anti-Exendin IgG IC <sub>50</sub> (nM) | Fold Anti-Exendin IgG for IC <sub>50</sub> | Anti-PEG IgG IC <sub>50</sub> (nM) | Fold Anti-PEG IgG for IC <sub>50</sub> |
|--------------------------|----------------------------------------|--------------------------------------------|------------------------------------|----------------------------------------|
| Exendin                  | 7.2 ± 1.1                              | 48 ± 7.3                                   | n/a                                | n/a                                    |
| Ex-PEG <sub>MW</sub>     | 26.9 ± 5.3                             | 10.0 ± 2.0                                 | 28.3 ± 3.5                         | 10.5 ± 1.3                             |
| Ex-POEGMA <sub>opt</sub> | 23.5 ± 3.1                             | 8.4 ± 1.1                                  | n/a                                | n/a                                    |

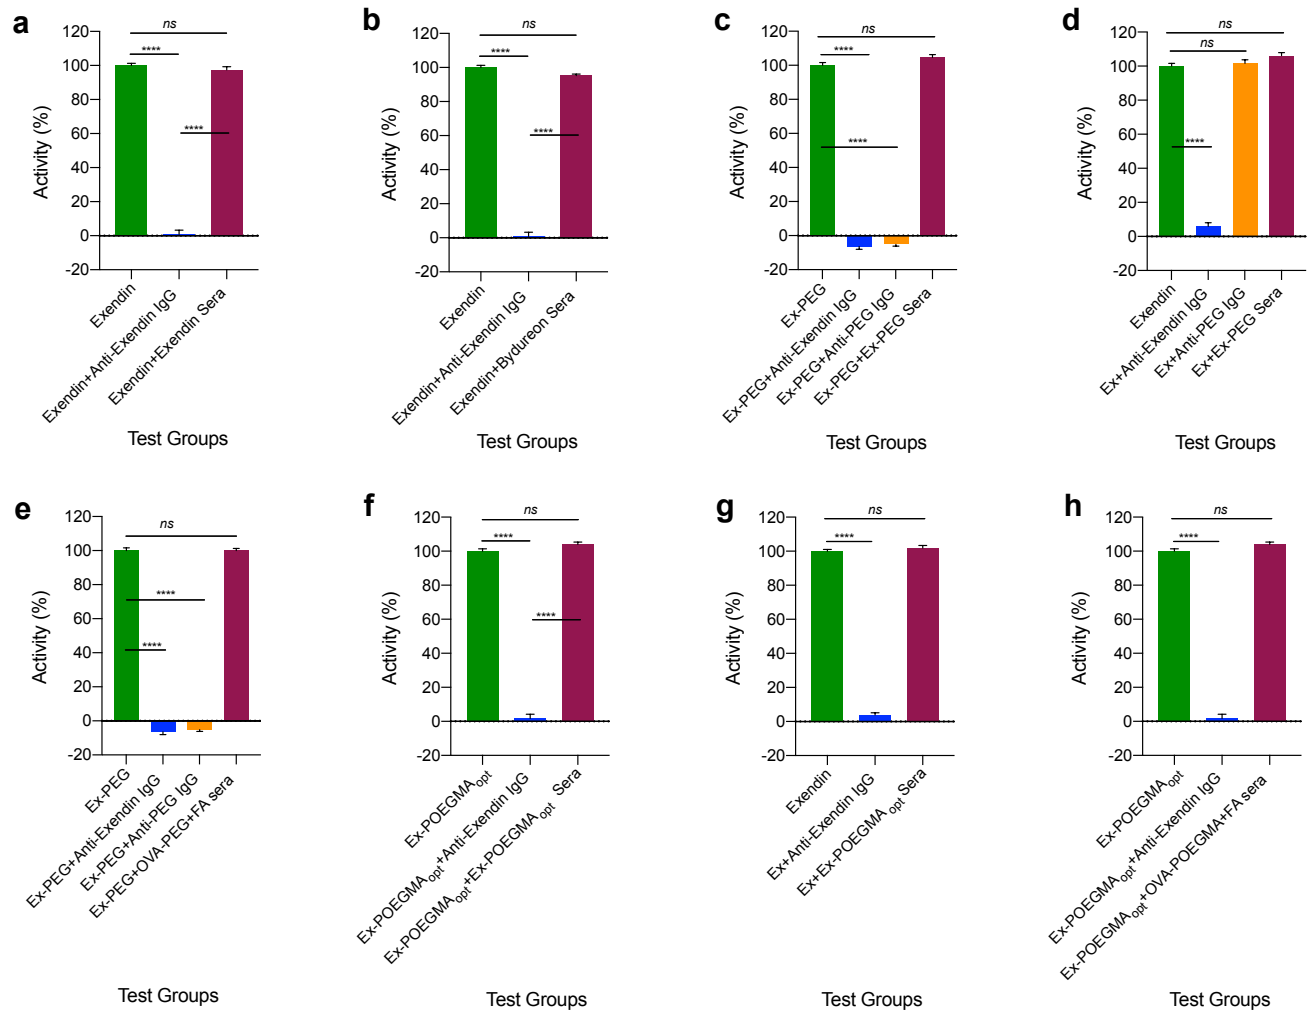

**Supplementary Figure 41. Anti-exendin and anti-PEG antibodies are not neutralizing.** *db/db* mice ( $n=5$ ) long-term treated for with (A) exendin and (B) Bydureon did not elicit any neutralizing anti-exendin antibodies. *db/db* mice long-term treated with Ex-PEG<sub>Rh</sub> did not elicit neutralizing antibodies towards (C) Ex-PEG<sub>Rh</sub> or (D) exendin. (E) Anti-PEG antibody positive mice sera did not neutralize Ex-PEG<sub>Rh</sub> activity. Ex-POEGMA<sub>opt</sub>-treated mice sera did not elicit any neutralizing antibodies reactive towards (F) Ex-POEGMA<sub>opt</sub> or (G) exendin. (H) Serum of C57BL/6J mice ( $n=10$ ), which received repeated administrations of OVA-POEGMA: Freund's adjuvant, did not neutralize Ex-POEGMA<sub>opt</sub>. The experiment was performed for each mouse serum separately ( $n=6$  wells per mouse serum). Data represent the mean drug activity and the SEM. Data were analyzed by two-way ANOVA, followed by *post-hoc* Tukey's multiple comparison test. Data were considered statistically significant when  $p<0.05$ . Not significant (ns;  $p>0.05$ ).

529 **Section 7. Histopathological effects of treatments**

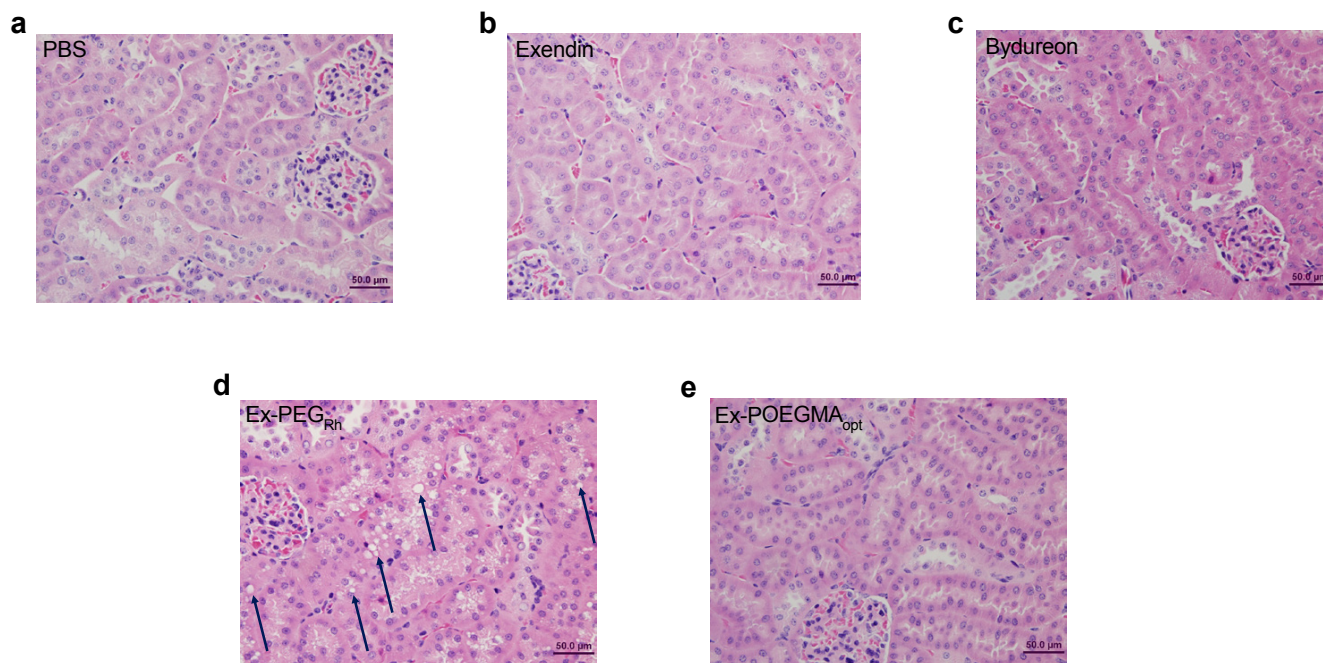

530  
 531 **Supplementary Figure 42. Histopathological effects of treatments on the kidney.** Representative histological slices of kidneys  
 532 from long-term (A) PBS-, (B) exendin-, (C) Bydureon-, (D) Ex-PEG<sub>Rh</sub>-, and (E) Ex-POEGMA<sub>opt</sub>-treated *db/db* mice (*n*=3). The mice  
 533 were treated weekly with s.c. injections of the treatments for eight weeks. At week 10, the mice were sacrificed, and organs were  
 534 collected, followed by processing and staining with H&E. Compound induced renal changes were present in kidneys in each of  
 535 the three Ex-PEG<sub>Rh</sub>-treated mice. These vacuolar lesions, marked by arrows in (D) were prominent primarily within renal tubular  
 536 epithelial cells of proximal tubules in the outer cortical region. No compound induced changes were noted in other treatments.  
 537 Scale bar = 50μm.

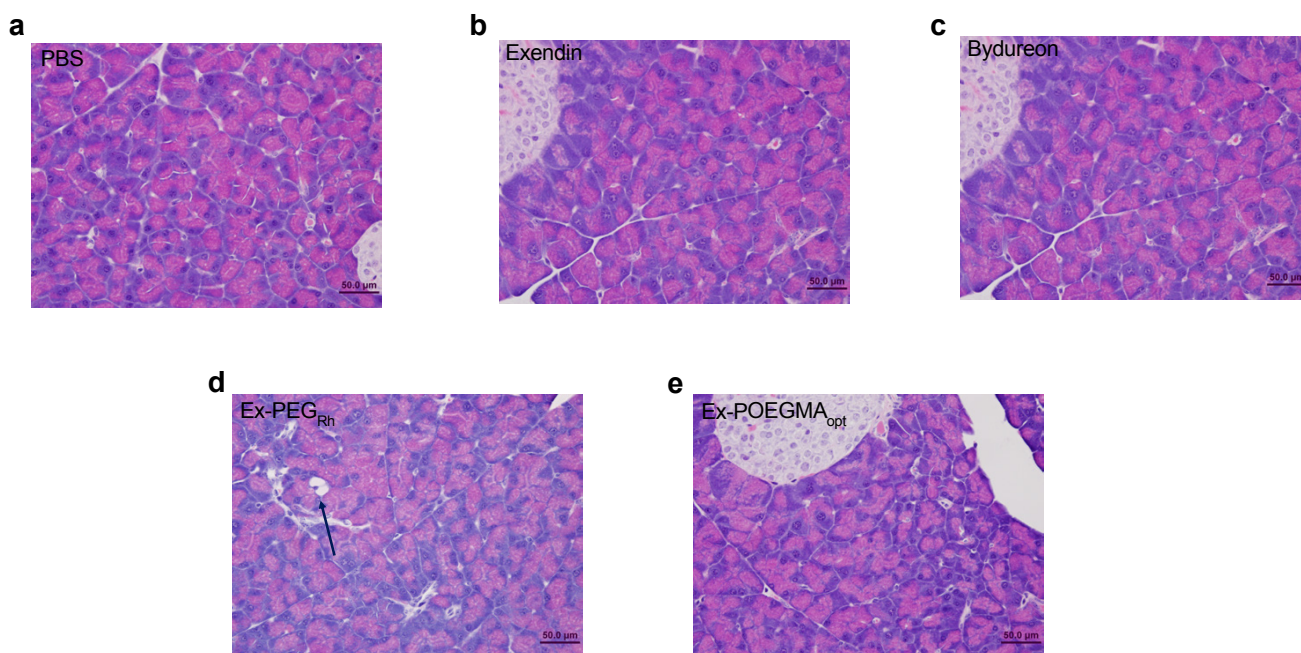

**Supplementary Figure 43. Histopathological effects of treatments on the pancreas.** Representative histological slices of pancreas collected from long-term (A) PBS-, (B) exendin-, (C) Bydureon-, (D) Ex-PEG<sub>Rh</sub>-, and (E) Ex-POEGMA<sub>opt</sub>-treated *db/db* mice (*n*=3). The mice were treated weekly with s.c. injections of the treatments for eight weeks. At week 10, the mice were sacrificed, and organs were collected, followed by processing and H&E staining. Minimal compound induced vacuolar lesions, marked by arrows in (D), were present in pancreases in each of the three Ex-PEG<sub>Rh</sub>-treated mice. Scale bar = 50μm.

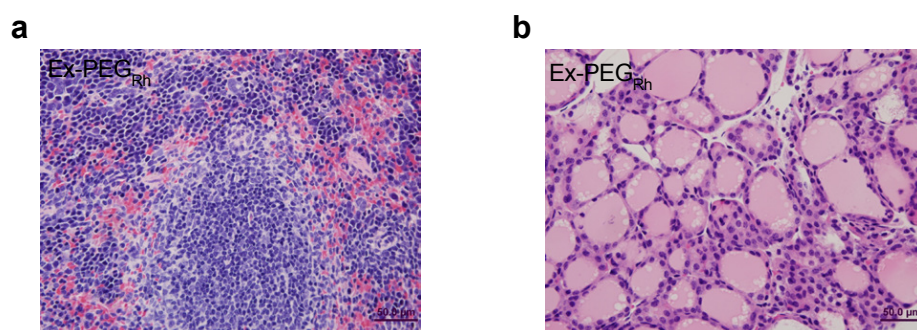

**Supplementary Figure 44. No Ex-PEG<sub>Rh</sub>-induced histopathological alterations were identified in the (A) spleen and (B) thyroid tissues.** Representative histological slices of pancreas collected from long-term Ex-PEG<sub>Rh</sub>-treated *db/db* mice (*n*=3). The mice were treated weekly with s.c. injections of the treatments for eight weeks. At week 10, the mice were sacrificed, and organs were collected, followed by processing and H&E staining. Scale bar = 50μm.

549    **References**

- 550    1        Luminex. *xMAP CookBook*. 4th edn, (2018).
- 551    2        Buse, J. B. *et al.* Liraglutide Treatment Is Associated with a Low Frequency and Magnitude of
- 552        Antibody Formation with No Apparent Impact on Glycemic Response or Increased Frequency of
- 553        Adverse Events: Results from the Liraglutide Effect and Action in Diabetes (LEAD) Trials. *The*
- 554        *Journal of Clinical Endocrinology & Metabolism* **96**, 1695-1702, doi:10.1210/jc.2010-2822 (2011).
